## RESEARCH ARTICLE

# Comparative analysis of disease modelling for health economic evaluations of systemic therapies in advanced hepatocellular carcinoma

Huimin Zou<sup>1</sup>, Yan Xue<sup>1</sup>, Xianwen Chen<sup>1</sup>, Yunfeng Lai<sup>2</sup>, Dongning Yao<sup>3</sup>, Carolina Oi Lam Ung<sup>1,4,5</sup>, Hao Hu<sup>1,4,5\*</sup>

**1** State Key Laboratory of Quality Research in Chinese Medicine, Institute of Chinese Medical Sciences, University of Macau, Macao SAR, China, **2** School of Public Health and Management, Guangzhou University of Chinese Medicine, Guangzhou, China, **3** Department of Drug Regulatory Science and Pharmacoeconomics, School of Pharmacy, Nanjing Medical University, Nanjing, China, **4** Centre for Pharmaceutical Regulatory Sciences, University of Macau, Macao SAR, China, **5** Department of Public Health and Medicinal Administration, Faculty of Health Sciences, University of Macau, Macao SAR, China

\* [haohu@um.edu.mo](mailto:haohu@um.edu.mo)

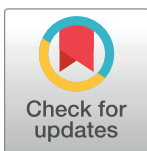

## OPEN ACCESS

**Citation:** Zou H, Xue Y, Chen X, Lai Y, Yao D, Ung COL, et al. (2023) Comparative analysis of disease modelling for health economic evaluations of systemic therapies in advanced hepatocellular carcinoma. PLoS ONE 18(10): e0292239. <https://doi.org/10.1371/journal.pone.0292239>

**Editor:** Po-Yao Hsu, Kaohsiung Medical University Hospital, TAIWAN

**Received:** July 6, 2023

**Accepted:** September 14, 2023

**Published:** October 5, 2023

**Copyright:** © 2023 Zou et al. This is an open access article distributed under the terms of the [Creative Commons Attribution License](https://creativecommons.org/licenses/by/4.0/), which permits unrestricted use, distribution, and reproduction in any medium, provided the original author and source are credited.

**Data Availability Statement:** All relevant data are within the paper and its [Supporting information files](#).

**Funding:** This research is supported by the funding of the Science and Technology Development Fund, Macau SAR (SKL-QRCM(UM)-2023-2025) and the University of Macau (MYRG2022-00113-ICMS). The funders had no role in study design, data collection and analysis, decision to publish, or preparation of the manuscript.

## Abstract

### Background

The objective of this study was to systematically analyse methodological and structural assumptions utilised in model-based health economic evaluations of systemic advanced hepatocellular carcinoma (HCC) therapies, discuss the existing challenges, and develop methodological recommendations for future models in advanced HCC.

### Methods

We performed literature searches using five databases (Embase, PubMed, Web of Science, Econlit, and CNKI) up to December 4, 2022. Technology appraisals from Canada, England, Australia, and the United States were also considered. Model-based full economic evaluations of systemic advanced HCC therapies in English or Chinese met the eligibility criteria. The reporting quality was assessed by using the Consolidated Health Economic Evaluation Reporting Standards 2022 checklist.

### Results

Of 12,863 records retrieved, 55 were eligible for inclusion. Markov model ( $n = 29$ , 53%) and partitioned survival model ( $n = 27$ , 49%) were the most commonly used modelling techniques. Most studies were based on health-state-driven structure ( $n = 51$ , 93%), followed by treatment-line-driven structure ( $n = 2$ , 4%) and combination structure ( $n = 1$ , 2%). Only three studies (5%) adopted external real-world data to extrapolate the overall survival or calibrate the extrapolation. Few studies reported the assumptions of transition probabilities. Utility modelling approaches were state-based ( $n = 51$ , 93%) and time-to-death ( $n = 1$ , 2%). Only

**Competing interests:** The authors have declared that no competing interests exist.

**Abbreviations:** BCLC, Barcelona Clinic Liver Cancer; BSC, best supportive care; CADTH, Canadian Agency for Drugs and Technologies in Health; CHEERS, Consolidated Health Economic Evaluation Reporting Standards; CNKI, China National Knowledge Infrastructure; HCC, hepatocellular carcinoma; HTA, health technology assessment; ICI, immune checkpoint inhibitor; IPD, individual patient data; LYG, life-year gained; NICE, National Institute for Health and Care Excellence; OS, overall survival; pCODR, pan-Canadian Oncology Drug Review; PD, progressive disease; PFS, progression-free survival; PRISMA, Preferred Reporting Items for Systematic Reviews and Meta-Analyses; QALY, quality-adjusted life-year; RCT, randomized controlled trial; RFS, recurrence-free survival; RWD, real-world data; SEER, Surveillance, Epidemiology, and End Results; TA, technology appraisal; TKI, tyrosine kinase inhibitor; US, United States; VEGF, vascular endothelial growth factor.

13 studies (24%) reported five types of model validation. Economic evaluation results of specific treatment strategies varied among studies.

## Conclusions

Disease modelling for health economic evaluations of systemic therapies in advanced HCC has adopted various modelling approaches and assumptions, leading to marked uncertainties in results. By proposing methodological recommendations, we suggest that future model-based studies for health economic evaluation of HCC therapies should follow good modelling practice guidelines and improve modelling methods to generate reliable health and economic evidence.

## Introduction

Hepatocellular carcinoma (HCC) raises a huge burden to societies and patients worldwide due to its high incidence, poor prognosis, and heavy costs. With approximately 906,000 diagnoses in 2020, primary liver cancer remains the 6<sup>th</sup> most frequently diagnosed cancer, and there will be over annual 1,000,000 patients affected by liver cancer by 2025 [1, 2]. HCC comprises around 90% of liver cancer cases, being the major pathological type in liver cancer [2]. A variety of risk factors for HCC have been proven, such as cirrhosis, chronic hepatitis B virus or hepatitis C virus infection, type 2 diabetes, obesity, non-alcoholic steatohepatitis, and heavy alcohol intake [2–5].

HCC progress rapidly, and most patients are diagnosed in an advanced stage. Although the emerging systemic therapies such as immune checkpoint inhibitors (ICIs)-based therapies have significantly improved the clinical outcomes in advanced HCC, the medical utilisation, productivity loss, and long and poor prognosis owing to the disease have brought a substantial economic burden to HCC patients and payers [6–8]. The costs of HCC are forecasted to exceed US\$500 million and JPY 607.2 billion annually in the United States (US) and Japan [9, 10]. Therefore, value evaluations integrating clinical effectiveness and costs are critical in determining cancer therapies. Health economic evaluations are needed to estimate the cost-effectiveness of HCC therapies.

However, health economic evaluations of HCC therapies face methodological challenges. Likhitsup et al. [11] conducted a focused review of cost-effectiveness and economic burden of surveillance and treatment in HCC before January 2019. Although they mainly concluded that several surveillance treatment modalities for HCC were cost-effective, they expressed concerns about the lack of descriptions of assumptions and approaches of modelling, insufficient uncertainty analysis, and improper evidence synthesis. As the decisions concerning assumptions employed and methods taken in health economic evaluations will impact the eventual decision model-based estimates, it demands more rigorous methodological reconsiderations for health economic evaluations of advanced HCC treatments [11].

Therefore, we aimed to comprehensively investigate the approaches used in model-based health economic evaluations of systemic therapies in advanced HCC, discuss the existing challenges in the adopted model approaches and assumptions, and develop methodological recommendations for future advanced HCC models.

## Methods

The procedure of this systematic literature review complied with the Preferred Reporting Items for Systematic Reviews and Meta-Analyses (PRISMA) guidelines [12]. Its protocol was registered in PROSPERO (CRD42023397657).

### Eligibility criteria

Table A in [S1 Appendix](#) presents the eligibility criteria for this review in accordance with the PICOS approach [13]. Studies were considered if they were model-based complete economic evaluations of systemic therapies for adult patients with advanced, metastatic or unresectable HCC. Studies published in English or Chinese were included. Partial or trial-based economic evaluations, conference abstracts, commentaries, editorials, reviews, animal studies, and *in vitro* studies were excluded.

### Data sources and search strategies

We performed literature searches using five databases, including Embase, PubMed, Web of Science, Econlit, and China National Knowledge Infrastructure (CNKI). In addition, relevant appraisals from four health technology assessment (HTA) agencies, including the Canadian Agency for Drugs and Technologies in Health (CADTH), the National Institute for Health and Care Excellence (NICE), the Medical Services Advisory Committee in Australia, and the Institute for Clinical and Economic Review, were also considered. The period of searches covered inception through December 4, 2022. “Hepatocellular carcinoma”, “economic”, “pharmacoeconomic”, and “cost” were used as the main search terms. Table B in [S1 Appendix](#) summarises the details of search strategies.

### Study selection

Three authors (HZ, YX, and XC) independently performed two rounds of study selection. Firstly, irrelevant results were excluded by screening retrieved titles and abstracts. Secondly, eligible studies were included by reviewing potential full texts. The references cited in included studies were also examined. In case of disagreements, two other authors (HH and COLU) were to assess and resolve their differences.

### Data extraction

One author (HZ) conducted the data extraction, with two other authors (YX and XC) verifying all the extracted information. Data elements consisted of the following aspects: first author, publication year, location, base case population, study design, treatment strategies, outcomes of economic evaluations, modelling technique, model structure, health states, progression, time horizon, cycle length, validation efforts, sensitivity analyses, clinical data source, time-to-event distributions, transition probabilities, study perspective, utility modelling approach, disutility, cost scope, and discount rates.

### Quality assessment

Two authors (HZ and YX) separately assessed the quality of peer-reviewed publications using the Consolidated Health Economic Evaluation Reporting Standards (CHEERS) 2022 checklist [14], and two other authors (HH and COLU) resolved the disagreements. Each CHEERS item was described as “reported”, “not reported”, and “not applicable”. We calculated a study-level quality score as the percentage of reported items in applicable ones. Since HTA agencies had

assessed the model specifications and described the quality of models critically in technology appraisals (TAs), further description of appraisal quality was not conducted in this review.

## Results

### Search results

Searches from databases and websites of HTA agencies yielded 12,863 studies. After removing duplicates, 9,435 records were screened according to titles and abstracts, which resulted in 434 remaining to be assessed for the full text. In full-text screening, 379 studies were excluded owing to the absence of a decision analysis model or systemic therapy for HCC. Finally, 55 studies (45 publications and 10 TAs) met the eligibility criteria (Fig 1), of which 10 appraisal documents comprising company submissions and all relevant evaluations (e.g., Evidence Review Group reports) were identified from pan-Canadian Oncology Drug Review (pCODR, n = 5) and NICE (n = 5).

### Quality assessment

The quality of included publications was described as the study-level quality scores in Table C in S1 Appendix. The percentage of each CHEERS item correctly reported is shown in Fig 2. Reporting quality scores varied from 57% to 86%. One publication (2% of all publications), 40 publications (89%), and four publications (9%) scored < 60%, 60%-80%, and ≥ 80%,

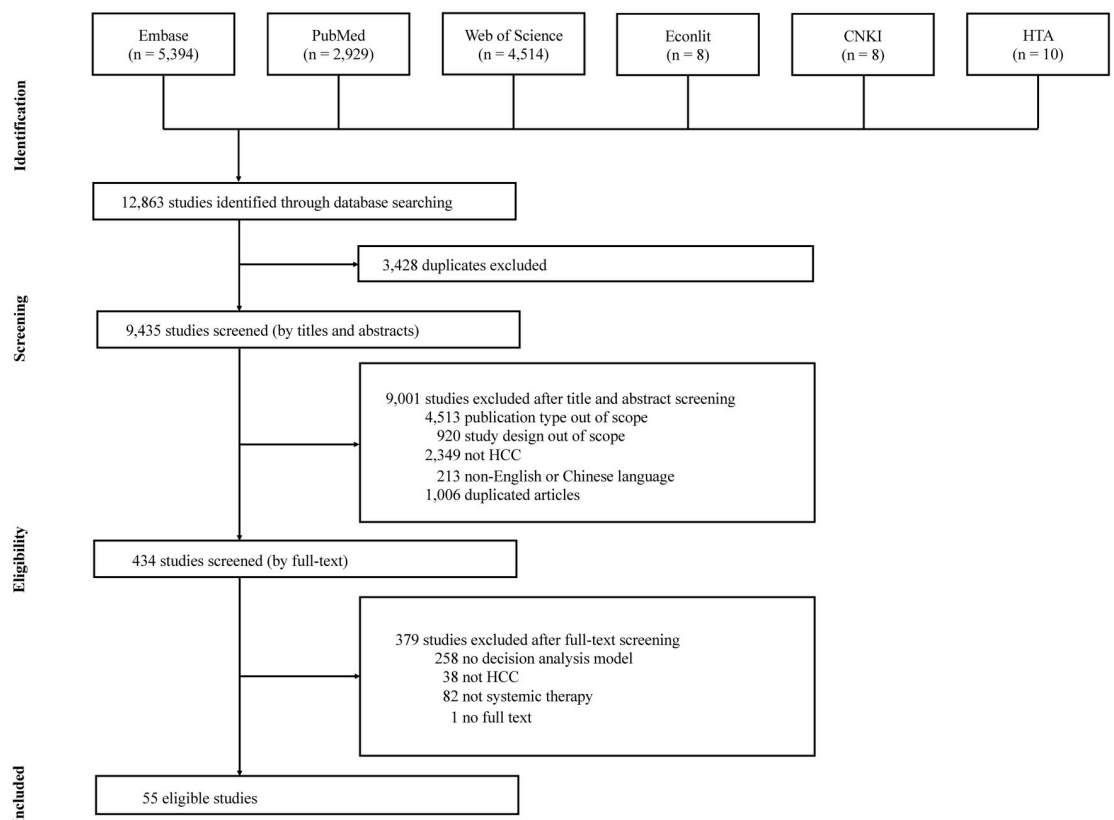

**Fig 1. PRISMA flowchart of study selection.** \*CNKI, China National Knowledge Infrastructure; HCC, hepatocellular carcinoma; HTA, health technology assessment.

<https://doi.org/10.1371/journal.pone.0292239.g001>

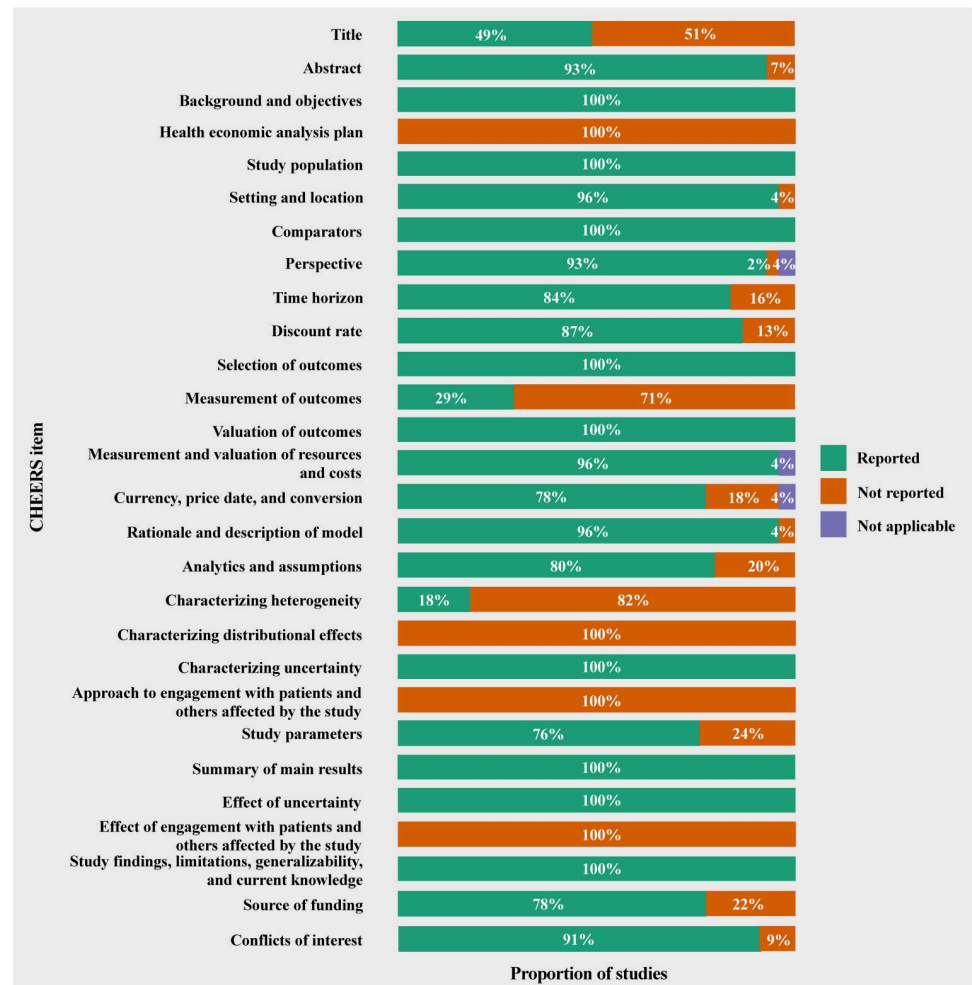

**Fig 2. Summary of the percentage of included publications reporting each CHEERS item.**

<https://doi.org/10.1371/journal.pone.0292239.g002>

respectively (Table C in [S1 Appendix](#)). Some items were not often appropriately reported ([Fig 2](#)). Thirty-two publications (71%) did not report the effectiveness measurement decision and thirty-seven (82%) did not characterize the heterogeneity. No publication followed a health economic analysis plan, engaged with patients and others in the research design, and characterized the distributional effects in the results. No study was excluded after the quality assessment since the objective of this review was to comprehensively summarize the modelling methods of systemic therapies in advanced HCC.

### General characteristics

General characteristics of included publications and TAs were presented in [Tables 1 and 2](#). Nineteen studies were conducted for China (35% of all studies), followed by the US ( $n = 16$ , 29%), Canada ( $n = 8$ , 15%), the United Kingdom (UK,  $n = 6$ , 11%), and Japan ( $n = 2$ , 4%). The modelled patient populations across identified studies were adults diagnosed as advanced, metastatic or unresectable HCC. Cost-utility analyses ( $n = 51$ , 93%) were the most used primary analyses, which considered quality-adjusted life-year (QALY) as the measure of health

Table 1. General characteristics of included full-text publications.

| Study                      | Location | Base case population                                                           | Study design                | Treatment line of focus | Interventions compared                                                                                                                                                                                                                                                                                                                                                                                                                                                                                        | Funding                                  |
|----------------------------|----------|--------------------------------------------------------------------------------|-----------------------------|-------------------------|---------------------------------------------------------------------------------------------------------------------------------------------------------------------------------------------------------------------------------------------------------------------------------------------------------------------------------------------------------------------------------------------------------------------------------------------------------------------------------------------------------------|------------------------------------------|
| Cabibbo et al. (2020) [28] | -        | Advanced HCC                                                                   | Risk-benefit analysis       | Sequences               | Lenvatinib-nivolumab vs. lenvatinib-pembrolizumab vs. atezolizumab plus bevacizumab-nivolumab vs. sorafenib-nivolumab vs. atezolizumab plus bevacizumab-pembrolizumab vs. lenvatinib-ramucirumab vs. lenvatinib-regorafenib vs. lenvatinib-cabozantinib vs. sorafenib-pembrolizumab vs. atezolizumab plus bevacizumab-ramucirumab vs. atezolizumab plus bevacizumab-regorafenib vs. atezolizumab plus bevacizumab-cabozantinib vs. sorafenib-cabozantinib vs. sorafenib-regorafenib vs. sorafenib-ramucirumab | Not specified, but industry employed     |
| Cabibbo et al. (2022) [29] | -        | Advanced HCC                                                                   | Risk-benefit analysis       | Sequences               | Atezolizumab plus bevacizumab-lenvatinib vs. atezolizumab plus bevacizumab-sorafenib after 2018 vs. atezolizumab plus bevacizumab-cabozantinib vs. atezolizumab plus bevacizumab-regorafenib vs. atezolizumab plus bevacizumab-sorafenib before 2018 vs. atezolizumab plus bevacizumab-ramucirumab                                                                                                                                                                                                            | Not specified, but industry employed     |
| Cai et al. (2020) [30]     | China    | Untreated, nonresected advanced HCC                                            | Cost-utility analysis       | First line              | Lenvatinib vs. sorafenib                                                                                                                                                                                                                                                                                                                                                                                                                                                                                      | Non-industry                             |
| Camma et al. (2013) [31]   | Italy    | Advanced HCC and intermediate HCC not eligible to or failed ablative therapies | Cost-utility analysis       | First line              | Full-dose sorafenib vs. BSC<br>Dose-adjusted sorafenib vs. BSC                                                                                                                                                                                                                                                                                                                                                                                                                                                | Not specified, but industry employed     |
| Carr et al. (2010) [15]    | US       | Treatment-naïve advanced HCC                                                   | Cost-effectiveness analysis | First line              | Sorafenib vs. BSC                                                                                                                                                                                                                                                                                                                                                                                                                                                                                             | Industry                                 |
| Chiang et al. (2020) [32]  | US       | Advanced HCC previously treated with sorafenib                                 | Cost-utility analysis       | Second line             | Pembrolizumab vs. placebo                                                                                                                                                                                                                                                                                                                                                                                                                                                                                     | Not specified, but industry employed     |
| Chiang et al. (2021) [33]  | US       | Unresectable HCC                                                               | Cost-utility analysis       | First line              | Atezolizumab plus bevacizumab vs. sorafenib                                                                                                                                                                                                                                                                                                                                                                                                                                                                   | Industry                                 |
| Elsisi et al. (2019) [19]  | Egypt    | Advanced HCC                                                                   | Cost-utility analysis       | First line              | Sorafenib vs. BSC                                                                                                                                                                                                                                                                                                                                                                                                                                                                                             | Not specified, but non-industry employed |

(Continued)

Table 1. (Continued)

| Study                        | Location         | Base case population                             | Study design                | Treatment line of focus | Interventions compared                                                                              | Funding                                  |
|------------------------------|------------------|--------------------------------------------------|-----------------------------|-------------------------|-----------------------------------------------------------------------------------------------------|------------------------------------------|
| Guan et al. (2022) [20]      | China            | Advanced HCC                                     | Cost-utility analysis       | First line              | Donafenib vs. sorafenib vs. lenvatinib                                                              | Non-industry                             |
| Gupta et al. (2019) [18]     | India            | Advanced HCC                                     | Cost-utility analysis       | First line              | Sorafenib vs. BSC                                                                                   | Not specified, but non-industry employed |
| Ho et al. (2018) [34]        | Taiwan           | Advanced HCC                                     | Cost-utility analysis       | First line              | Sorafenib combination therapy vs. sorafenib monotherapy                                             | Non-industry                             |
| Hou et al. (2020) [35]       | China            | Advanced metastatic or unresectable HCC          | Cost-utility analysis       | First line              | Atezolizumab plus bevacizumab vs. sorafenib                                                         | Not specified, but non-industry employed |
| Ikeda et al. (2021) [36]     | Japan            | Unresectable HCC                                 | Cost-utility analysis       | First line              | Lenvatinib vs. sorafenib                                                                            | Industry                                 |
| Kim et al. (2020) [37]       | Canada           | Unresectable HCC                                 | Cost-utility analysis       | First line              | Lenvatinib vs. sorafenib                                                                            | Non-industry                             |
| Kobayashi et al. (2019) [38] | Japan            | Intermediate and advanced unresectable HCC       | Cost-utility analysis       | First line              | Lenvatinib vs. sorafenib                                                                            | Not specified, but industry employed     |
| Li et al. (2021) [39]        | China            | Advanced HCC with portal vein invasion           | Cost-utility analysis       | First line              | HAIC plus sorafenib vs. sorafenib                                                                   | Non-industry                             |
| Li et al. (2022) [24]        | China            | Advanced or unresectable HCC                     | Cost-utility analysis       | First line              | Sintilimab plus bevacizumab biosimilar vs. sorafenib<br>Atezolizumab plus bevacizumab vs. sorafenib | Not specified, but non-industry employed |
| Li et al. (2022) [40]        | US               | Advanced or unresectable HCC                     | Cost-utility analysis       | First line              | Atezolizumab plus bevacizumab vs. nivolumab                                                         | Non-industry                             |
| Liao et al. (2019) [41]      | US, UK and China | Sorafenib-resistant HCC                          | Cost-utility analysis       | Second line             | Cabozantinib vs. BSC                                                                                | Non-industry                             |
| Liu et al. (2022) [42]       | China and US     | Locally advanced, metastatic or unresectable HCC | Cost-utility analysis       | First line              | Atezolizumab plus bevacizumab vs. sorafenib                                                         | Non-industry                             |
| Meng et al. (2021) [43]      | China            | Advanced HCC previously treated with sorafenib   | Cost-utility analysis       | Second line             | Pembrolizumab vs. placebo                                                                           | Non-industry                             |
| Meng et al. (2022) [23]      | China            | Unresectable or metastatic HCC                   | Cost-utility analysis       | First line              | Donafenib vs. sorafenib                                                                             | Not specified, but non-industry employed |
| Meng et al. (2022) [21]      | China            | Unresectable or metastatic HCC                   | Cost-utility analysis       | First line              | Donafenib vs. lenvatinib                                                                            | Not specified, but non-industry employed |
| Meyers et al. (2021) [44]    | Canada           | Untreated advanced or unresectable HCC           | Cost-utility analysis       | First line              | Lenvatinib vs. sorafenib                                                                            | Industry                                 |
| Muszbek et al. (2008) [16]   | Canada           | Treatment-naïve advanced HCC                     | Cost-effectiveness analysis | First line              | Sorafenib vs. BSC                                                                                   | Industry                                 |
| Parikh et al. (2017) [45]    | US               | Advanced HCC previously treated with sorafenib   | Cost-utility analysis       | Second line             | Regorafenib vs. BSC                                                                                 | Not specified, but industry employed     |
| Peng et al. (2022) [25]      | China            | Unresectable HCC                                 | Cost-utility analysis       | First line              | Sintilimab plus bevacizumab biosimilar vs. sorafenib                                                | Non-industry                             |
| Qin et al. (2018) [46]       | China            | Advanced or metastatic HCC                       | Cost-utility analysis       | First line              | FOLFOX4 vs. sorafenib                                                                               | Industry                                 |

(Continued)

Table 1. (Continued)

| Study                                  | Location       | Base case population                                                                                  | Study design          | Treatment line of focus | Interventions compared                                                                                                                                                                                            | Funding                                  |
|----------------------------------------|----------------|-------------------------------------------------------------------------------------------------------|-----------------------|-------------------------|-------------------------------------------------------------------------------------------------------------------------------------------------------------------------------------------------------------------|------------------------------------------|
| Saiyed et al. (2020) [47]              | Australia      | Treatment-naïve advanced HCC                                                                          | Cost-utility analysis | First line              | Lenvatinib vs. sorafenib                                                                                                                                                                                          | Not specified, but non-industry employed |
| Sangmala et al. (2018) [48]            | Thailand       | Advanced HCC                                                                                          | Cost-utility analysis | First line              | Sorafenib vs. palliative care                                                                                                                                                                                     | Not specified, but non-industry employed |
| Sherrow et al. (2020) [49]             | US             | Advanced HCC                                                                                          | Cost-utility analysis | Sequences               | Sorafenib-regorafenib vs. sorafenib-cabozantinib vs. sorafenib-pembrolizumab vs. sorafenib-nivolumab vs. lenvatinib-regorafenib vs. lenvatinib-cabozantinib vs. lenvatinib-pembrolizumab vs. lenvatinib-nivolumab | Industry                                 |
| Shi et al. (2021) [50]                 | China          | Advanced HCC previously treated with sorafenib or systemic chemotherapy                               | Cost-utility analysis | Second line             | Two-week regimen of camrelizumab vs. three-week regimen of camrelizumab                                                                                                                                           | Not specified, but non-industry employed |
| Shlomai et al. (2018) [51]             | US             | Advanced HCC previously treated with sorafenib                                                        | Cost-utility analysis | Second line             | Regorafenib vs. BSC                                                                                                                                                                                               | Not specified, but non-industry employed |
| Shlomai et al. (2019) [52]             | US             | Advanced HCC                                                                                          | Cost-utility analysis | Second line             | Cabozantinib vs. BSC                                                                                                                                                                                              | Not specified, but non-industry employed |
| Sieg et al. (2020) [53]                | Germany and US | Advanced HCC received prior sorafenib                                                                 | Cost-utility analysis | Second line             | Cabozantinib vs. BSC                                                                                                                                                                                              | Not specified, but non-industry employed |
| Soto-Perez-de-Celis et al. (2019) [54] | US             | Advanced HCC received prior sorafenib                                                                 | Cost-utility analysis | Second line             | Cabozantinib vs. BSC                                                                                                                                                                                              | Not specified, but non-industry employed |
| Su et al. (2021) [55]                  | US             | Unresectable HCC                                                                                      | Cost-utility analysis | First line              | Atezolizumab plus bevacizumab vs. sorafenib                                                                                                                                                                       | Non-industry                             |
| Wen et al. (2021) [56]                 | China and US   | Unresectable HCC                                                                                      | Cost-utility analysis | First line              | Atezolizumab plus bevacizumab vs. sorafenib                                                                                                                                                                       | Non-industry                             |
| Zhang et al. (2015) [17]               | China          | Advanced HCC                                                                                          | Cost-utility analysis | First line              | Sorafenib vs. BSC                                                                                                                                                                                                 | Not specified, but non-industry employed |
| Zhang et al. (2016) [57]               | China          | Advanced HCC                                                                                          | Cost-utility analysis | First line              | FOLFOX4 vs. sorafenib                                                                                                                                                                                             | Not specified, but non-industry employed |
| Zhang et al. (2021) [58]               | US             | Locally advanced metastatic or unresectable HCC                                                       | Cost-utility analysis | First line              | Atezolizumab plus bevacizumab vs. sorafenib                                                                                                                                                                       | Non-industry                             |
| Zhao et al. (2022) [22]                | China          | Unresectable HCC                                                                                      | Cost-utility analysis | First line              | Sorafenib vs. lenvatinib vs. donafenib vs. sintilimab plus bevacizumab biosimilar vs. atezolizumab plus bevacizumab                                                                                               | Non-industry                             |
| Zheng et al. (2020) [59]               | US             | Advanced HCC received prior sorafenib with $\alpha$ -fetoprotein concentrations of at least 400 ng/ml | Cost-utility analysis | Second line             | Ramucirumab vs. placebo                                                                                                                                                                                           | Non-industry                             |

(Continued)



Table 1. (Continued)

| Study                   | Location | Base case population           | Study design          | Treatment line of focus | Interventions compared                                | Funding  |
|-------------------------|----------|--------------------------------|-----------------------|-------------------------|-------------------------------------------------------|----------|
| Zhou et al. (2022) [26] | China    | Unresectable or metastatic HCC | Cost-utility analysis | First line              | Sintilimab plus bevacizumab biosimilar vs. sorafenib  | Industry |
| Zhou et al. (2022) [27] | China    | Unresectable or metastatic HCC | Cost-utility analysis | First line              | Sintilimab plus bevacizumab biosimilar vs. lenvatinib | Industry |

Abbreviations: BSC, best supportive care; HAIC, hepatic arterial infusion of chemotherapy; HCC, hepatocellular carcinoma; UK, United Kingdom; US, United States.

<https://doi.org/10.1371/journal.pone.0292239.t001>

outcome. Of the remaining studies with life-year gained (LYG) serving as a health outcome, two performed cost-effectiveness analyses (4%), while the other two performed risk-benefit analyses (4%). Regarding the treatment setting, 37 studies (67%) concerned first-line therapies and 15 studies (27%) concerned second-line therapies, whereas the remaining three (5%)

Table 2. General characteristics of included technology appraisals.

| TA                      | Location | Base case population                                                                                                           | Study design          | Treatment line of focus    | Interventions compared                                                                      | Funding      |
|-------------------------|----------|--------------------------------------------------------------------------------------------------------------------------------|-----------------------|----------------------------|---------------------------------------------------------------------------------------------|--------------|
| NICE TA 474 (2017) [60] | UK       | Advanced HCC when surgical or locoregional therapies had failed or were not suitable                                           | Cost-utility analysis | First line                 | Sorafenib vs. BSC                                                                           | Non-industry |
| NICE TA 551 (2018) [61] | UK       | Untreated, advanced, unresectable HCC                                                                                          | Cost-utility analysis | First line                 | Lenvatinib vs. sorafenib                                                                    | Non-industry |
| NICE TA 555 (2019) [62] | UK       | Advanced unresectable HCC previously treated with sorafenib                                                                    | Cost-utility analysis | Second line                | Regorafenib vs. BSC                                                                         | Non-industry |
| NICE TA 666 (2020) [63] | UK       | Advanced or unresectable HCC                                                                                                   | Cost-utility analysis | First line                 | Atezolizumab plus bevacizumab vs. sorafenib<br>Atezolizumab plus bevacizumab vs. lenvatinib | Non-industry |
| NICE TA 849 (2022) [64] | UK       | Advanced HCC previously treated with sorafenib                                                                                 | Cost-utility analysis | Second line                | Cabozantinib vs. regorafenib                                                                | Non-industry |
| pCODR 10119 (2018) [65] | Canada   | Unresectable HCC following treatment with sorafenib                                                                            | Cost-utility analysis | Second line                | Regorafenib vs. BSC                                                                         | Non-industry |
| pCODR 10134 (2018) [66] | Canada   | Sorafenib-refractory or intolerant advanced (not amenable to curative therapy or local therapeutic measures) or metastatic HCC | Cost-utility analysis | Second line                | Nivolumab vs. BSC                                                                           | Non-industry |
| pCODR 10175 (2019) [67] | Canada   | Advanced, unresectable HCC                                                                                                     | Cost-utility analysis | First line                 | Lenvatinib vs. sorafenib                                                                    | Non-industry |
| pCODR 10186 (2020) [68] | Canada   | Advanced HCC previously treated with sorafenib                                                                                 | Cost-utility analysis | Second line and third line | Cabozantinib vs. BSC<br>Cabozantinib vs. regorafenib                                        | Non-industry |
| pCODR 10217 (2020) [69] | Canada   | Unresectable or metastatic HCC                                                                                                 | Cost-utility analysis | First line                 | Atezolizumab plus bevacizumab vs. sorafenib<br>Atezolizumab plus bevacizumab vs. lenvatinib | Non-industry |

Abbreviations: BSC, best supportive care; HCC, hepatocellular carcinoma; NICE, National Institute for Health and Care Excellence; pCODR, pan-Canadian Oncology Drug Review; TA, technology appraisal; UK, United Kingdom.

<https://doi.org/10.1371/journal.pone.0292239.t002>

compared distinct sequences of therapies. The comparisons of tyrosine kinase inhibitors (TKIs) versus best supportive care (BSC,  $n = 16$ , 29%) and different TKIs-based treatments ( $n = 16$ , 29%) were the most frequently evaluated, followed by ICIs plus anti-vascular endothelial growth factor (VEGF) antibodies compared with TKIs ( $n = 13$ , 24%), ICIs against BSC/placebo ( $n = 3$ , 5%), different ICIs-based regimens ( $n = 2$ , 4%), and chemotherapy regimens compared with TKIs ( $n = 2$ , 4%). Nine studies (16%) were funded by industry, and six studies (11%) were not supported by specific funding but the authors were employed by industry.

### Economic evaluation results

Economic evaluation results of the similar or same treatment settings for advanced HCC varied among studies (Tables D and E in [S1 Appendix](#)). For instance, first-line sorafenib compared with BSC resulted in cost-effectiveness from two studies conducted for the US (ICER US \$62,473/LY gained, willingness-to-pay threshold of US\$100,000/LY, 2007 values) and Canada (ICER Can\$75,759/LY gained, willingness-to-pay threshold of Can\$100,000/LY, 2007 values) [15, 16], while one Chinese study, one Indian study, and one Egyptian study reported that sorafenib was not cost-effective with ICERs of US\$101,399.11/QALY gained (willingness-to-pay threshold of US\$20,301/QALY, 2012 values), US\$7,861/QALY gained (willingness-to-pay threshold of 1–3 times the GDP per capita for India, 2017 values), and US\$286,776/QALY gained (willingness-to-pay threshold of US\$41,372/QALY, 2017 values), respectively [17–19]. Of the Chinese studies including first-line treatment with donafenib, all but one showed improved cost-effectiveness in donafenib in comparison with sorafenib and lenvatinib [20–22], whereas the other study considered that donafenib was not a cost-effective strategy compared to sorafenib with an ICER of US\$41,081.52/QALY gained (willingness-to-pay threshold of US\$10,499.74–31,499.23/QALY, 2020 values) [23]. Regarding initial treatment with sintilimab plus bevacizumab biosimilar, one Chinese analysis revealed that it lacked cost-effectiveness when compared with sorafenib (ICER US\$51,877.36/QALY gained), lenvatinib (ICER US\$56,890.35/QALY gained), and donafenib (ICER US\$66,487.88/QALY gained, willingness-to-pay threshold of US\$33,521/QALY, 2020 values) [22], although the other four analyses showed a cost-effective profile of sintilimab plus bevacizumab biosimilar in China [24–27]. For other treatment strategies, significant differences in results were also observed among studies, for which the reasons were probably that different modelling approaches and assumptions were adopted.

### Decision model characteristics

[Table 3](#) and Tables F and G in [S1 Appendix](#) summarised the main methodological characteristics of included decision models consisting of modelling technique and structure, time horizon, cycle length, discounting, clinical effectiveness inputs, utility and cost inputs, sensitivity analyses, and validation efforts.

**Summary of included decision models.** [Table 3](#) provided an overview of the general characteristics of included decision models. Markov model ( $n = 29$ , 53%) and partitioned survival model ( $n = 27$ , 49%) were the most commonly used modelling techniques for systemic therapies in advanced HCC. Two studies (4%) investigated both approaches to explore structural uncertainty [42, 43]. One study (2%) from the US did not detail the technique used [54].

Concerning model structure, most studies were based on a core structure of advanced HCC defined by a disease pathway of traditional three health states: progression-free survival (PFS), progressive disease (PD), and death ( $n = 51$ , 93%). Of these models, four divided the PD state into continuous first-line treatment and off-first-line treatment after progression [15, 16, 48, 60], one model added a state in PFS to reflect intolerance (adverse events) [51], one model

**Table 3. Summary of included decision models.**

| Study                      | Modelling technique | Model structure | Health states                                                                                                                         | Progression                                                                                                                                                                                                                                                                                                                                                                                                                                                                                                                                                                                                                                                                                                                                                                                                                                                                                                                                               | Time horizon | Cycle length | Discount rate | Validation efforts      | Sensitivity analyses                                          |
|----------------------------|---------------------|-----------------|---------------------------------------------------------------------------------------------------------------------------------------|-----------------------------------------------------------------------------------------------------------------------------------------------------------------------------------------------------------------------------------------------------------------------------------------------------------------------------------------------------------------------------------------------------------------------------------------------------------------------------------------------------------------------------------------------------------------------------------------------------------------------------------------------------------------------------------------------------------------------------------------------------------------------------------------------------------------------------------------------------------------------------------------------------------------------------------------------------------|--------------|--------------|---------------|-------------------------|---------------------------------------------------------------|
| Cabibbo et al. (2020) [28] | Markov model        | Treatment lines | 1 <sup>st</sup> line treatment, 2 <sup>nd</sup> line treatment, death                                                                 | <ul style="list-style-type: none"> <li>1<sup>st</sup> line treatment-1<sup>st</sup> line treatment</li> <li>1<sup>st</sup> line treatment-2<sup>nd</sup> line treatment</li> <li>2<sup>nd</sup> line treatment-2<sup>nd</sup> line treatment</li> <li>2<sup>nd</sup> line treatment-death</li> </ul>                                                                                                                                                                                                                                                                                                                                                                                                                                                                                                                                                                                                                                                      | Lifetime     | 1 month      | -             | -                       | 1-way SA, 2-way SA, PSA                                       |
| Cabibbo et al. (2022) [29] | Markov model        | Treatment lines | 1 <sup>st</sup> line treatment, 2 <sup>nd</sup> line treatment, death                                                                 | <ul style="list-style-type: none"> <li>1<sup>st</sup> line treatment-1<sup>st</sup> line treatment</li> <li>1<sup>st</sup> line treatment-2<sup>nd</sup> line treatment</li> <li>2<sup>nd</sup> line treatment-2<sup>nd</sup> line treatment</li> <li>2<sup>nd</sup> line treatment-death</li> </ul>                                                                                                                                                                                                                                                                                                                                                                                                                                                                                                                                                                                                                                                      | Lifetime     | 1 month      | -             | -                       | 2-way SA                                                      |
| Cai et al. (2020) [30]     | Markov model        | Health states   | PFS, PD, death                                                                                                                        | <ul style="list-style-type: none"> <li>PFS-PFS</li> <li>PFS-PD</li> <li>PD-PD</li> <li>PD-death</li> </ul>                                                                                                                                                                                                                                                                                                                                                                                                                                                                                                                                                                                                                                                                                                                                                                                                                                                | 10 years     | 1 month      | 3%            | -                       | 1-way SA, PSA                                                 |
| Camma et al. (2013) [31]   | Markov model        | Health states   | BCLC B HCC, BCLC C HCC, death                                                                                                         | <ul style="list-style-type: none"> <li>BCLC B HCC-death</li> <li>BCLC C HCC-death</li> </ul>                                                                                                                                                                                                                                                                                                                                                                                                                                                                                                                                                                                                                                                                                                                                                                                                                                                              | 5 years      | -            | 3%            | Face validity, internal | 1-way SA, PSA                                                 |
| Carr et al. (2010) [15]    | Markov model        | Health states   | 1 <sup>st</sup> line treatment-no progression, 1 <sup>st</sup> line treatment continued-post progression, BSC-post progression, death | <p>Sorafenib:</p> <ul style="list-style-type: none"> <li>1<sup>st</sup> line no progression-1<sup>st</sup> line no progression</li> <li>1<sup>st</sup> line no progression-1<sup>st</sup> line continued post progression</li> <li>1<sup>st</sup> line no progression-BSC</li> <li>1<sup>st</sup> line no progression-death</li> <li>1<sup>st</sup> line continued post progression-1<sup>st</sup> line continued post progression</li> <li>1<sup>st</sup> line continued post progression-BSC</li> <li>1<sup>st</sup> line continued post progression-death</li> <li>BSC-BSC</li> <li>BSC-death</li> </ul> <p>BSC:</p> <ul style="list-style-type: none"> <li>1<sup>st</sup> line no progression-1<sup>st</sup> line no progression</li> <li>1<sup>st</sup> line no progression-BSC post-progression</li> <li>1<sup>st</sup> line no progression-death</li> <li>BSC post-progression-BSC post-progression</li> <li>BSC post-progression-death</li> </ul> | 14 years     | 1 month      | 3%            | Face validity           | 1-way SA, PSA, scenario analyses                              |
| Chiang et al. (2020) [32]  | Markov model        | Health states   | PFS, PD, death                                                                                                                        | <ul style="list-style-type: none"> <li>PFS-PFS</li> <li>PFS-death</li> <li>PFS-PD</li> <li>PD-PD</li> <li>PD-death</li> </ul>                                                                                                                                                                                                                                                                                                                                                                                                                                                                                                                                                                                                                                                                                                                                                                                                                             | 3 years      | 3 weeks      | 3%            | -                       | 1-way SA, 2-way SA, PSA, scenario analyses, subgroup analyses |
| Chiang et al. (2021) [33]  | Markov model        | Health states   | PFS, PD, death                                                                                                                        | <ul style="list-style-type: none"> <li>PFS-PFS</li> <li>PFS-death</li> <li>PFS-PD</li> <li>PD-PD</li> <li>PD-death</li> </ul>                                                                                                                                                                                                                                                                                                                                                                                                                                                                                                                                                                                                                                                                                                                                                                                                                             | 5 years      | 3 weeks      | 3%            | -                       | 1-way SA, 2-way SA, PSA, scenario analyses, subgroup analyses |
| Elsisi et al. (2019) [19]  | Markov model        | Health states   | PFS, PD, death                                                                                                                        | <ul style="list-style-type: none"> <li>PFS-PFS</li> <li>PFS-death</li> <li>PFS-PD</li> <li>PD-PD</li> <li>PD-death</li> </ul>                                                                                                                                                                                                                                                                                                                                                                                                                                                                                                                                                                                                                                                                                                                                                                                                                             | 4 years      | 1 month      | 3.5%          | Face validity           | 1-way SA, PSA                                                 |

(Continued)

Table 3. (Continued)

| Study                        | Modelling technique                         | Model structure | Health states       | Progression                                                                                                                                                                                                          | Time horizon | Cycle length | Discount rate       | Validation efforts         | Sensitivity analyses             |
|------------------------------|---------------------------------------------|-----------------|---------------------|----------------------------------------------------------------------------------------------------------------------------------------------------------------------------------------------------------------------|--------------|--------------|---------------------|----------------------------|----------------------------------|
| Guan et al. (2022) [20]      | Partitioned survival model                  | Health states   | PFS, PD, death      | <ul style="list-style-type: none"> <li>• PFS-PFS</li> <li>• PFS-death</li> <li>• PFS-PD</li> <li>• PD-PD</li> <li>• PD-death</li> </ul>                                                                              | Lifetime     | 1 week       | 5%                  | -                          | 1-way SA, PSA, scenario analyses |
| Gupta et al. (2019) [18]     | Markov model                                | Health states   | PFS, PD, death      | <ul style="list-style-type: none"> <li>• PFS-PFS</li> <li>• PFS-death</li> <li>• PFS-PD</li> <li>• PD-PD</li> <li>• PD-death</li> </ul>                                                                              | Lifetime     | 1 month      | 3%                  | -                          | PSA, scenario analyses           |
| Ho et al. (2018) [34]        | Markov model                                | Health states   | PFS, PD, death      | <ul style="list-style-type: none"> <li>• PFS-PFS</li> <li>• PFS-death</li> <li>• PFS-PD</li> <li>• PD-PD</li> <li>• PD-death</li> </ul>                                                                              | 5 years      | 1 month      | 3%                  | -                          | 1-way SA, PSA                    |
| Hou et al. (2020) [35]       | Partitioned survival model                  | Health states   | PFS, PD, death      | <ul style="list-style-type: none"> <li>• PFS-PFS</li> <li>• PFS-death</li> <li>• PFS-PD</li> <li>• PD-PD</li> <li>• PD-death</li> </ul>                                                                              | -            | 1 week       | 5%                  | -                          | 1-way SA, PSA, subgroup analyses |
| Ikeda et al. (2021) [36]     | Partitioned survival model                  | Health states   | PFS, PD, death      | <ul style="list-style-type: none"> <li>• PFS-PFS</li> <li>• PFS-death</li> <li>• PFS-PD</li> <li>• PD-PD</li> <li>• PD-death</li> </ul>                                                                              | 20 years     | 4 weeks      | 2%                  | -                          | 1-way SA, PSA, scenario analyses |
| Kim et al. (2020) [37]       | Markov model                                | Health states   | PFS, PD, death      | <ul style="list-style-type: none"> <li>• PFS-PFS</li> <li>• PFS-death</li> <li>• PFS-PD</li> <li>• PD-PD</li> <li>• PD-death</li> </ul>                                                                              | 5 years      | 1 month      | 1.5%                | -                          | PSA, subgroup analyses           |
| Kobayashi et al. (2019) [38] | Partitioned survival model                  | Health states   | PFS, PD, death      | <ul style="list-style-type: none"> <li>• PFS-PFS</li> <li>• PFS-death</li> <li>• PFS-PD</li> <li>• PD-PD</li> <li>• PD-death</li> </ul>                                                                              | Lifetime     | 4 weeks      | 2%                  | -                          | DSA, PSA, scenario analyses      |
| Li et al. (2021) [39]        | Markov model                                | Health states   | PFS, RFS, PD, death | <ul style="list-style-type: none"> <li>• PFS-PFS</li> <li>• PFS-RFS</li> <li>• PFS-PD</li> <li>• PFS-death</li> <li>• RFS-RFS</li> <li>• RFS-PD</li> <li>• RFS-death</li> <li>• PD-PD</li> <li>• PD-death</li> </ul> | 8 years      | 3 weeks      | 3%                  | -                          | 1-way SA, PSA                    |
| Li et al. (2022) [24]        | Partitioned survival model                  | Health states   | PFS, PD, death      | <ul style="list-style-type: none"> <li>• PFS-PFS</li> <li>• PFS-death</li> <li>• PFS-PD</li> <li>• PD-PD</li> <li>• PD-death</li> </ul>                                                                              | 15 years     | 1 month      | 5%                  | -                          | 1-way SA, PSA, scenario analyses |
| Li et al. (2022) [40]        | Partitioned survival model                  | Health states   | PFS, PD, death      | <ul style="list-style-type: none"> <li>• PFS-PFS</li> <li>• PFS-death</li> <li>• PFS-PD</li> <li>• PD-PD</li> <li>• PD-death</li> </ul>                                                                              | 10 years     | 1 month      | 3%                  | -                          | 1-way SA, PSA, subgroup analyses |
| Liao et al. (2019) [41]      | Markov model                                | Health states   | PFS, PD, death      | <ul style="list-style-type: none"> <li>• PFS-death</li> <li>• PFS-PD</li> <li>• PD-death</li> </ul>                                                                                                                  | 10 years     | 1 month      | 3%                  | Face validity, calibration | 1-way SA, PSA                    |
| Liu et al. (2022) [42]       | Markov model and partitioned survival model | Health states   | PFS, PD, death      | <ul style="list-style-type: none"> <li>• PFS-PFS</li> <li>• PFS-death</li> <li>• PFS-PD</li> <li>• PD-PD</li> <li>• PD-death</li> </ul>                                                                              | 10 years     | 1 month      | China: 5%<br>US: 3% | -                          | 1-way SA, PSA, scenario analyses |

(Continued)

Table 3. (Continued)

| Study                      | Modelling technique                         | Model structure | Health states                                                                                                                         | Progression                                                                                                                                                                                                                                                                                                                                                                                                                                                                                                                                                                                                                                                                                                                                                                                                                                                                                                                                                                           | Time horizon | Cycle length | Discount rate | Validation efforts | Sensitivity analyses             |
|----------------------------|---------------------------------------------|-----------------|---------------------------------------------------------------------------------------------------------------------------------------|---------------------------------------------------------------------------------------------------------------------------------------------------------------------------------------------------------------------------------------------------------------------------------------------------------------------------------------------------------------------------------------------------------------------------------------------------------------------------------------------------------------------------------------------------------------------------------------------------------------------------------------------------------------------------------------------------------------------------------------------------------------------------------------------------------------------------------------------------------------------------------------------------------------------------------------------------------------------------------------|--------------|--------------|---------------|--------------------|----------------------------------|
| Meng et al. (2021) [43]    | Markov model and partitioned survival model | Health states   | PFS, PD, death                                                                                                                        | <ul style="list-style-type: none"> <li>• PFS-PFS</li> <li>• PFS-death</li> <li>• PFS-PD</li> <li>• PD-PD</li> <li>• PD-death</li> </ul>                                                                                                                                                                                                                                                                                                                                                                                                                                                                                                                                                                                                                                                                                                                                                                                                                                               | Lifetime     | 3 weeks      | 5%            | -                  | 1-way SA, PSA, scenario analyses |
| Meng et al. (2022) [23]    | Partitioned survival model                  | Health states   | PFS, PD, death                                                                                                                        | <ul style="list-style-type: none"> <li>• PFS-PFS</li> <li>• PFS-death</li> <li>• PFS-PD</li> <li>• PD-PD</li> <li>• PD-death</li> </ul>                                                                                                                                                                                                                                                                                                                                                                                                                                                                                                                                                                                                                                                                                                                                                                                                                                               | Lifetime     | 4 weeks      | 5%            | -                  | 1-way SA, PSA, scenario analyses |
| Meng et al. (2022) [21]    | Partitioned survival model                  | Health states   | PFS, PD, death                                                                                                                        | <ul style="list-style-type: none"> <li>• PFS-PFS</li> <li>• PFS-death</li> <li>• PFS-PD</li> <li>• PD-PD</li> <li>• PD-death</li> </ul>                                                                                                                                                                                                                                                                                                                                                                                                                                                                                                                                                                                                                                                                                                                                                                                                                                               | Lifetime     | 4 weeks      | 5%            | -                  | 1-way SA, PSA, scenario analyses |
| Meyers et al. (2021) [44]  | Partitioned survival model                  | Health states   | PFS, PD, death                                                                                                                        | <ul style="list-style-type: none"> <li>• PFS-PFS</li> <li>• PFS-death</li> <li>• PFS-PD</li> <li>• PD-PD</li> <li>• PD-death</li> </ul>                                                                                                                                                                                                                                                                                                                                                                                                                                                                                                                                                                                                                                                                                                                                                                                                                                               | 10 years     | 4 weeks      | 1.5%          | Face validity      | 1-way SA, PSA, scenario analyses |
| Muszbek et al. (2008) [16] | Markov model                                | Health states   | 1 <sup>st</sup> line treatment-no progression, 1 <sup>st</sup> line treatment continued-post progression, BSC-post progression, death | <p>Sorafenib:</p> <ul style="list-style-type: none"> <li>• 1<sup>st</sup> line no progression-1<sup>st</sup> line no progression</li> <li>• 1<sup>st</sup> line no progression-1<sup>st</sup> line continued post progression</li> <li>• 1<sup>st</sup> line no progression-BSC</li> <li>• 1<sup>st</sup> line no progression-death</li> <li>• 1<sup>st</sup> line continued post progression-1<sup>st</sup> line continued post progression</li> <li>• 1<sup>st</sup> line continued post progression-BSC</li> <li>• 1<sup>st</sup> line continued post progression-death</li> <li>• BSC-BSC</li> <li>• BSC-death</li> </ul> <p>BSC:</p> <ul style="list-style-type: none"> <li>• 1<sup>st</sup> line no progression-1<sup>st</sup> line no progression</li> <li>• 1<sup>st</sup> line no progression-BSC post-progression</li> <li>• 1<sup>st</sup> line no progression-death</li> <li>• BSC post-progression-BSC post-progression</li> <li>• BSC post-progression-death</li> </ul> | 14 years     | 1 month      | 5%            | Face validity      | 1-way SA, PSA, scenario analyses |

(Continued)

Table 3. (Continued)

| Study                     | Modelling technique        | Model structure | Health states                                                                                                                         | Progression                                                                                                                                                                                                                                                                                                                                                                                                                                                                                                                                                                                                                                                                                                                                                                                                                                                                                                                                                             | Time horizon | Cycle length | Discount rate | Validation efforts                                  | Sensitivity analyses                                          |
|---------------------------|----------------------------|-----------------|---------------------------------------------------------------------------------------------------------------------------------------|-------------------------------------------------------------------------------------------------------------------------------------------------------------------------------------------------------------------------------------------------------------------------------------------------------------------------------------------------------------------------------------------------------------------------------------------------------------------------------------------------------------------------------------------------------------------------------------------------------------------------------------------------------------------------------------------------------------------------------------------------------------------------------------------------------------------------------------------------------------------------------------------------------------------------------------------------------------------------|--------------|--------------|---------------|-----------------------------------------------------|---------------------------------------------------------------|
| NICE TA 474 (2017) [60]   | Markov model               | Health states   | 1 <sup>st</sup> line treatment-no progression, 1 <sup>st</sup> line treatment continued-post progression, BSC-post progression, death | Sorafenib: <ul style="list-style-type: none"> <li>• 1<sup>st</sup> line no progression-1<sup>st</sup> line no progression</li> <li>• 1<sup>st</sup> line no progression-1<sup>st</sup> line continued post progression</li> <li>• 1<sup>st</sup> line no progression-BSC</li> <li>• 1<sup>st</sup> line no progression-death</li> <li>• 1<sup>st</sup> line continued post progression-1<sup>st</sup> line continued post progression</li> <li>• 1<sup>st</sup> line continued post progression-BSC</li> <li>• 1<sup>st</sup> line continued post progression-death</li> <li>• BSC-BSC</li> <li>• BSC-death</li> </ul> BSC: <ul style="list-style-type: none"> <li>• 1<sup>st</sup> line no progression-1<sup>st</sup> line no progression</li> <li>• 1<sup>st</sup> line no progression-BSC post-progression</li> <li>• 1<sup>st</sup> line no progression-death</li> <li>• BSC post-progression-BSC post-progression</li> <li>• BSC post-progression-death</li> </ul> | 14 years     | 1 month      | 3.5%          | Face validity, internal, external                   | 1-way SA, 2-way SA, PSA, scenario analyses, subgroup analyses |
| NICE TA 551 (2018) [61]   | Partitioned survival model | Health states   | PFS, PD, death                                                                                                                        | -                                                                                                                                                                                                                                                                                                                                                                                                                                                                                                                                                                                                                                                                                                                                                                                                                                                                                                                                                                       | 20 years     | 1 month      | 3.5%          | -                                                   | Scenario analyses                                             |
| NICE TA 555 (2019) [62]   | Partitioned survival model | Health states   | PFS, PD, death                                                                                                                        | -                                                                                                                                                                                                                                                                                                                                                                                                                                                                                                                                                                                                                                                                                                                                                                                                                                                                                                                                                                       | 15 years     | -            | -             | -                                                   | 1-way SA, PSA, scenario analyses                              |
| NICE TA 666 (2020) [63]   | Partitioned survival model | Health states   | PFS, PD, death                                                                                                                        | <ul style="list-style-type: none"> <li>• PFS-PFS</li> <li>• PFS-death</li> <li>• PFS-PD</li> <li>• PD-PD</li> <li>• PD-death</li> </ul>                                                                                                                                                                                                                                                                                                                                                                                                                                                                                                                                                                                                                                                                                                                                                                                                                                 | 20 years     | 1 week       | 3.5%          | Face validity, internal, cross-validation, external | 1-way SA, PSA, scenario analyses                              |
| NICE TA 849 (2022) [64]   | Partitioned survival model | Health states   | PFS, PD, death                                                                                                                        | <ul style="list-style-type: none"> <li>• PFS-PFS</li> <li>• PFS-death</li> <li>• PFS-PD</li> <li>• PD-PD</li> <li>• PD-death</li> </ul>                                                                                                                                                                                                                                                                                                                                                                                                                                                                                                                                                                                                                                                                                                                                                                                                                                 | 15 years     | 4 weeks      | 3.5%          | Face validity, internal, cross-validation           | 1-way SA, PSA, scenario analyses                              |
| Parikh et al. (2017) [45] | Markov model               | Health states   | PFS, PD, death                                                                                                                        | <ul style="list-style-type: none"> <li>• PFS-death</li> <li>• PFS-PD</li> <li>• PD-death</li> </ul>                                                                                                                                                                                                                                                                                                                                                                                                                                                                                                                                                                                                                                                                                                                                                                                                                                                                     | -            | 1 week       | 3%            | -                                                   | 1-way SA, 2-way SA, PSA                                       |
| pCODR 10119 (2018) [65]   | Partitioned survival model | Health states   | PFS, PD, death                                                                                                                        | -                                                                                                                                                                                                                                                                                                                                                                                                                                                                                                                                                                                                                                                                                                                                                                                                                                                                                                                                                                       | 3 years      | -            | -             | -                                                   | 1-way SA, scenario analyses                                   |
| pCODR 10134 (2018) [66]   | Partitioned survival model | Health states   | PFS, PD, death                                                                                                                        | <ul style="list-style-type: none"> <li>• PFS-PFS</li> <li>• PFS-death</li> <li>• PFS-PD</li> <li>• PD-PD</li> <li>• PD-death</li> </ul>                                                                                                                                                                                                                                                                                                                                                                                                                                                                                                                                                                                                                                                                                                                                                                                                                                 | 3 years      | 1 week       | -             | -                                                   | 1-way SA, PSA, scenario analyses                              |
| pCODR 10175 (2019) [67]   | Partitioned survival model | Health states   | PFS, PD, death                                                                                                                        | <ul style="list-style-type: none"> <li>• PFS-PFS</li> <li>• PFS-death</li> <li>• PFS-PD</li> <li>• PD-PD</li> <li>• PD-death</li> </ul>                                                                                                                                                                                                                                                                                                                                                                                                                                                                                                                                                                                                                                                                                                                                                                                                                                 | 10 years     | -            | -             | -                                                   | 1-way SA, PSA, scenario analyses                              |
| pCODR 10186 (2020) [68]   | Partitioned survival model | Health states   | PFS, PD, death                                                                                                                        | <ul style="list-style-type: none"> <li>• PFS-PFS</li> <li>• PFS-death</li> <li>• PFS-PD</li> <li>• PD-PD</li> <li>• PD-death</li> </ul>                                                                                                                                                                                                                                                                                                                                                                                                                                                                                                                                                                                                                                                                                                                                                                                                                                 | 5 years      | 1 month      | -             | -                                                   | PSA, scenario analyses                                        |
| pCODR 10217 (2020) [69]   | Partitioned survival model | Health states   | PFS, PD, death                                                                                                                        | -                                                                                                                                                                                                                                                                                                                                                                                                                                                                                                                                                                                                                                                                                                                                                                                                                                                                                                                                                                       | 10 years     | -            | -             | -                                                   | -                                                             |

(Continued)

Table 3. (Continued)

| Study                       | Modelling technique        | Model structure | Health states                                                                                                                                     | Progression                                                                                                                                                                                                                                                                                                                                                                                                                                                                                                                                                                                                                                                                                                                                                                                                                                                                                                                                                                                                                                                                                                   | Time horizon | Cycle length | Discount rate | Validation efforts         | Sensitivity analyses             |
|-----------------------------|----------------------------|-----------------|---------------------------------------------------------------------------------------------------------------------------------------------------|---------------------------------------------------------------------------------------------------------------------------------------------------------------------------------------------------------------------------------------------------------------------------------------------------------------------------------------------------------------------------------------------------------------------------------------------------------------------------------------------------------------------------------------------------------------------------------------------------------------------------------------------------------------------------------------------------------------------------------------------------------------------------------------------------------------------------------------------------------------------------------------------------------------------------------------------------------------------------------------------------------------------------------------------------------------------------------------------------------------|--------------|--------------|---------------|----------------------------|----------------------------------|
| Peng et al. (2022) [25]     | Markov model               | Health states   | PFS, PD, death                                                                                                                                    | <ul style="list-style-type: none"> <li>• PFS-PFS</li> <li>• PFS-death</li> <li>• PFS-PD</li> <li>• PD-PD</li> <li>• PD-death</li> </ul>                                                                                                                                                                                                                                                                                                                                                                                                                                                                                                                                                                                                                                                                                                                                                                                                                                                                                                                                                                       | Lifetime     | 3 weeks      | 3%            | -                          | 1-way SA, PSA                    |
| Qin et al. (2018) [46]      | Markov model               | Health states   | PFS, PD, death                                                                                                                                    | <ul style="list-style-type: none"> <li>• PFS-PFS</li> <li>• PFS-death</li> <li>• PFS-PD</li> <li>• PD-PD</li> <li>• PD-death</li> </ul>                                                                                                                                                                                                                                                                                                                                                                                                                                                                                                                                                                                                                                                                                                                                                                                                                                                                                                                                                                       | Lifetime     | 1 month      | 5%            | Face validity              | 1-way SA, PSA, scenario analyses |
| Saiyed et al. (2020) [47]   | Partitioned survival model | Health states   | PFS, PD, death                                                                                                                                    | <ul style="list-style-type: none"> <li>• PFS-PFS</li> <li>• PFS-death</li> <li>• PFS-PD</li> <li>• PD-PD</li> <li>• PD-death</li> </ul>                                                                                                                                                                                                                                                                                                                                                                                                                                                                                                                                                                                                                                                                                                                                                                                                                                                                                                                                                                       | 10 years     | 1 month      | 5%            | External, cross-validation | 1-way SA, PSA, scenario analyses |
| Sangmala et al. (2018) [48] | Markov model               | Health states   | 1 <sup>st</sup> line treatment-no progression, 1 <sup>st</sup> line treatment continued-post progression, palliative care-post progression, death | <p>Sorafenib:</p> <ul style="list-style-type: none"> <li>• 1<sup>st</sup> line no progression-1<sup>st</sup> line no progression</li> <li>• 1<sup>st</sup> line no progression-1<sup>st</sup> line continued post progression</li> <li>• 1<sup>st</sup> line no progression-palliative care</li> <li>• 1<sup>st</sup> line no progression-death</li> <li>• 1<sup>st</sup> line continued post progression-1<sup>st</sup> line continued post progression</li> <li>• 1<sup>st</sup> line continued post progression-palliative care</li> <li>• 1<sup>st</sup> line continued post progression-death</li> <li>• Palliative care-palliative care</li> <li>• Palliative care-death</li> </ul> <p>Palliative care:</p> <ul style="list-style-type: none"> <li>• 1<sup>st</sup> line no progression-1<sup>st</sup> line no progression</li> <li>• 1<sup>st</sup> line no progression-palliative care post-progression</li> <li>• 1<sup>st</sup> line no progression-death</li> <li>• Palliative care post-progression-palliative care post-progression</li> <li>• Palliative care post-progression-death</li> </ul> | Lifetime     | 1 month      | 3%            | -                          | 1-way SA, PSA                    |

(Continued)

Table 3. (Continued)

| Study                      | Modelling technique        | Model structure                 | Health states                                                                                                                                                                                                                                                                                                                                                                                                | Progression                                                                                                                                                                                                                                                                                                                                                                                                                                                                                                                                                                                                                                                                                                                                                                                                                                                                                                                                                                                                                                                                                                                                                                                                                                                                                                                                                                                                                                                                                                                                                                                                                                                                                                                                                                                                                                                                                                                                                                                                                                                                                                                                                                                                                                                                                                                                         | Time horizon | Cycle length                                             | Discount rate | Validation efforts | Sensitivity analyses |
|----------------------------|----------------------------|---------------------------------|--------------------------------------------------------------------------------------------------------------------------------------------------------------------------------------------------------------------------------------------------------------------------------------------------------------------------------------------------------------------------------------------------------------|-----------------------------------------------------------------------------------------------------------------------------------------------------------------------------------------------------------------------------------------------------------------------------------------------------------------------------------------------------------------------------------------------------------------------------------------------------------------------------------------------------------------------------------------------------------------------------------------------------------------------------------------------------------------------------------------------------------------------------------------------------------------------------------------------------------------------------------------------------------------------------------------------------------------------------------------------------------------------------------------------------------------------------------------------------------------------------------------------------------------------------------------------------------------------------------------------------------------------------------------------------------------------------------------------------------------------------------------------------------------------------------------------------------------------------------------------------------------------------------------------------------------------------------------------------------------------------------------------------------------------------------------------------------------------------------------------------------------------------------------------------------------------------------------------------------------------------------------------------------------------------------------------------------------------------------------------------------------------------------------------------------------------------------------------------------------------------------------------------------------------------------------------------------------------------------------------------------------------------------------------------------------------------------------------------------------------------------------------------|--------------|----------------------------------------------------------|---------------|--------------------|----------------------|
| Sherron et al. (2020) [49] | Markov model               | Health states + treatment lines | 1 <sup>st</sup> line:<br>1 <sup>st</sup> line treatment, 1 <sup>st</sup> line treatment with toxicity, 1 <sup>st</sup> line discontinuation due to toxicity, 1 <sup>st</sup> line progression, death<br>2 <sup>nd</sup> line:<br>2 <sup>nd</sup> line treatment, 2 <sup>nd</sup> line treatment with toxicity, 2 <sup>nd</sup> line discontinuation due to toxicity, 2 <sup>nd</sup> line progression, death | <ul style="list-style-type: none"> <li>• 1<sup>st</sup> line treatment-1<sup>st</sup> line treatment</li> <li>• 1<sup>st</sup> line treatment-1<sup>st</sup> line w/toxicity</li> <li>• 1<sup>st</sup> line treatment-discontinue 1<sup>st</sup> line</li> <li>• 1<sup>st</sup> line treatment-1<sup>st</sup> line progression</li> <li>• 1<sup>st</sup> line treatment-death</li> <li>• 1<sup>st</sup> line w/toxicity-1<sup>st</sup> line treatment</li> <li>• 1<sup>st</sup> line w/toxicity-1<sup>st</sup> line w/toxicity</li> <li>• 1<sup>st</sup> line w/toxicity-discontinue 1<sup>st</sup> line</li> <li>• 1<sup>st</sup> line w/toxicity-1<sup>st</sup> line progression</li> <li>• 1<sup>st</sup> line w/toxicity-death</li> <li>• Discontinue 1<sup>st</sup> line-2<sup>nd</sup> line treatment</li> <li>• Discontinue 1<sup>st</sup> line-2<sup>nd</sup> line w/toxicity</li> <li>• Discontinue 1<sup>st</sup> line-discontinue 2<sup>nd</sup> line</li> <li>• Discontinue 1<sup>st</sup> line-death</li> <li>• 1<sup>st</sup> line progression-2<sup>nd</sup> line treatment</li> <li>• 1<sup>st</sup> line progression-2<sup>nd</sup> line w/toxicity</li> <li>• 1<sup>st</sup> line progression-discontinue 2<sup>nd</sup> line</li> <li>• 1<sup>st</sup> line progression-death</li> <li>• 2<sup>nd</sup> line treatment-2<sup>nd</sup> line treatment</li> <li>• 2<sup>nd</sup> line treatment-2<sup>nd</sup> line w/toxicity</li> <li>• 2<sup>nd</sup> line treatment-discontinue 2<sup>nd</sup> line</li> <li>• 2<sup>nd</sup> line treatment-2<sup>nd</sup> line progression</li> <li>• 2<sup>nd</sup> line treatment-death</li> <li>• 2<sup>nd</sup> line w/toxicity-2<sup>nd</sup> line treatment</li> <li>• 2<sup>nd</sup> line w/toxicity-2<sup>nd</sup> line w/toxicity</li> <li>• 2<sup>nd</sup> line w/toxicity-discontinue 2<sup>nd</sup> line</li> <li>• 2<sup>nd</sup> line w/toxicity-2<sup>nd</sup> line progression</li> <li>• 2<sup>nd</sup> line w/toxicity-death</li> <li>• Discontinue 2<sup>nd</sup> line-discontinue 2<sup>nd</sup> line</li> <li>• Discontinue 2<sup>nd</sup> line-2<sup>nd</sup> line progression</li> <li>• Discontinue 2<sup>nd</sup> line-death</li> <li>• 2<sup>nd</sup> line progression-2<sup>nd</sup> line progression</li> <li>• 2<sup>nd</sup> line progression-death</li> </ul> | -            | 1 month                                                  | -             | Face validity      | PSA                  |
| Shi et al. (2021) [50]     | Partitioned survival model | Health states                   | PFS, PD, death                                                                                                                                                                                                                                                                                                                                                                                               | <ul style="list-style-type: none"> <li>• PFS-PFS</li> <li>• PFS-death</li> <li>• PFS-PD</li> <li>• PD-PD</li> <li>• PD-death</li> </ul>                                                                                                                                                                                                                                                                                                                                                                                                                                                                                                                                                                                                                                                                                                                                                                                                                                                                                                                                                                                                                                                                                                                                                                                                                                                                                                                                                                                                                                                                                                                                                                                                                                                                                                                                                                                                                                                                                                                                                                                                                                                                                                                                                                                                             | Lifetime     | Two-week regimen: 2 weeks<br>Three-week regimen: 3 weeks | 5%            | -                  | 1-way SA, PSA        |

(Continued)



Table 3. (Continued)

| Study                                  | Modelling technique        | Model structure | Health states                          | Progression                                                                                                                                                                                                                                                                      | Time horizon | Cycle length | Discount rate | Validation efforts | Sensitivity analyses             |
|----------------------------------------|----------------------------|-----------------|----------------------------------------|----------------------------------------------------------------------------------------------------------------------------------------------------------------------------------------------------------------------------------------------------------------------------------|--------------|--------------|---------------|--------------------|----------------------------------|
| Shlomai et al. (2018) [51]             | Markov model               | Health states   | PFS without AE, PFS with AE, PD, death | <ul style="list-style-type: none"> <li>• PFS without AE-PFS without AE</li> <li>• PFS without AE-PFS with AE</li> <li>• PFS without AE-PD</li> <li>• PFS without AE-death</li> <li>• PFS with AE-PD</li> <li>• PFS with AE-death</li> <li>• PD-PD</li> <li>• PD-death</li> </ul> | -            | 4 weeks      | 3%            | -                  | 1-way SA, PSA                    |
| Shlomai et al. (2019) [52]             | Markov model               | Health states   | PFS, PD, death                         | <ul style="list-style-type: none"> <li>• PFS-PD</li> <li>• PFS-death</li> <li>• PD-death</li> </ul>                                                                                                                                                                              | 5 years      | 4 weeks      | 3%            | -                  | 1-way SA, PSA                    |
| Sieg et al. (2020) [53]                | Markov model               | Health states   | PFS, PD, death                         | <ul style="list-style-type: none"> <li>• PFS-PFS</li> <li>• PFS-death</li> <li>• PFS-PD</li> <li>• PD-PD</li> <li>• PD-death</li> </ul>                                                                                                                                          | 7 years      | 1 month      | 3%            | -                  | 1-way SA, PSA, scenario analyses |
| Soto-Perez-de-Celis et al. (2019) [54] | -                          | Health states   | PFS, PD, death                         | <ul style="list-style-type: none"> <li>• PFS-death</li> <li>• PFS-PD</li> <li>• PD-death</li> </ul>                                                                                                                                                                              | -            | -            | -             | -                  | 1-way SA                         |
| Su et al. (2021) [55]                  | Partitioned survival model | Health states   | PFS, PD, death                         | <ul style="list-style-type: none"> <li>• PFS-PFS</li> <li>• PFS-death</li> <li>• PFS-PD</li> <li>• PD-PD</li> <li>• PD-death</li> </ul>                                                                                                                                          | -            | 1 week       | 3%            | -                  | 1-way SA, PSA, subgroup analyses |
| Wen et al. (2021) [56]                 | Markov model               | Health states   | PFS, PD, death                         | <ul style="list-style-type: none"> <li>• PFS-PFS</li> <li>• PFS-death</li> <li>• PFS-PD</li> <li>• PD-PD</li> <li>• PD-death</li> </ul>                                                                                                                                          | 10 years     | 1 month      | 3%            | Calibration        | 1-way SA, PSA                    |
| Zhang et al. (2015) [17]               | Markov model               | Health states   | PFS, PD, death                         | <ul style="list-style-type: none"> <li>• PFS-PFS</li> <li>• PFS-death</li> <li>• PFS-PD</li> <li>• PD-PD</li> <li>• PD-death</li> </ul>                                                                                                                                          | -            | 1 month      | 3%            | -                  | 1-way SA, subgroup analyses      |
| Zhang et al. (2016) [57]               | Markov model               | Health states   | PFS, PD, death                         | <ul style="list-style-type: none"> <li>• PFS-PFS</li> <li>• PFS-death</li> <li>• PFS-PD</li> <li>• PD-PD</li> <li>• PD-death</li> </ul>                                                                                                                                          | 10 years     | 1 month      | -             | -                  | 1-way SA, PSA                    |
| Zhang et al. (2021) [58]               | Partitioned survival model | -               | -                                      | -                                                                                                                                                                                                                                                                                | 6 years      | 1 month      | 3%            | -                  | 1-way SA, PSA, subgroup analyses |
| Zhao et al. (2022) [22]                | Partitioned survival model | Health states   | PFS, PD, death                         | <ul style="list-style-type: none"> <li>• PFS-PFS</li> <li>• PFS-death</li> <li>• PFS-PD</li> <li>• PD-PD</li> <li>• PD-death</li> </ul>                                                                                                                                          | 10 years     | 1 month      | 5%            | -                  | 1-way SA, PSA, scenario analyses |
| Zheng et al. (2020) [59]               | Markov model               | Health states   | PFS, PD, death                         | <ul style="list-style-type: none"> <li>• PFS-PFS</li> <li>• PFS-death</li> <li>• PFS-PD</li> <li>• PD-PD</li> <li>• PD-death</li> </ul>                                                                                                                                          | 10 years     | 1 month      | 3%            | -                  | 1-way SA, PSA, scenario analyses |
| Zhou et al. (2022) [26]                | Partitioned survival model | Health states   | PFS, PD, death                         | <ul style="list-style-type: none"> <li>• PFS-PFS</li> <li>• PFS-death</li> <li>• PFS-PD</li> <li>• PD-PD</li> <li>• PD-death</li> </ul>                                                                                                                                          | Lifetime     | 3 weeks      | 5%            | -                  | 1-way SA, PSA, scenario analyses |

(Continued)

Table 3. (Continued)

| Study                   | Modelling technique        | Model structure | Health states  | Progression                                                                                                                             | Time horizon | Cycle length | Discount rate | Validation efforts | Sensitivity analyses             |
|-------------------------|----------------------------|-----------------|----------------|-----------------------------------------------------------------------------------------------------------------------------------------|--------------|--------------|---------------|--------------------|----------------------------------|
| Zhou et al. (2022) [27] | Partitioned survival model | Health states   | PFS, PD, death | <ul style="list-style-type: none"> <li>• PFS-PFS</li> <li>• PFS-death</li> <li>• PFS-PD</li> <li>• PD-PD</li> <li>• PD-death</li> </ul> | Lifetime     | 3 weeks      | 5%            | Face validity      | 1-way SA, PSA, scenario analyses |

Abbreviations: BCLC, Barcelona Clinic Liver Cancer; BSC, best supportive care; HCC, hepatocellular carcinoma; NICE, National Institute for Health and Care Excellence; pCODR, pan-Canadian Oncology Drug Review; PD, progressive disease; PFS, progression-free survival; PSA, probabilistic sensitivity analysis; RFS, recurrence-free survival; SA, sensitivity analysis; TA, technology appraisal.

<https://doi.org/10.1371/journal.pone.0292239.t003>

involved an additional recurrence-free survival (RFS) state [39], and one merged PFS and PD into one disease state [31]. The disease progression in the health-state-driven model structure was that (Fig 3), in general, advanced HCC patients receiving systemic therapy started in the PFS state, following which they could stop treatment due to intolerance (adverse events). Before transitioning to PD, patients could experience an additional state of RFS. Once in the PD state, patients could either continue or stop previous treatment. Also, the transition to death could happen from any health state in the model.

Two studies (4%) employed a treatment-line-driven structure in which patients could progress from receiving first-line treatment to second-line treatment and later switch to death (Fig 4) [28, 29]. One study (2%) applied a combination structure of health-state and treatment-line-driven ones, allowing nine health states for two lines of treatment [49]. Within the model, patients began by receiving first-line treatment, and they could progress to any state of the first-line treatment regardless of whether toxicity occurred or not. After first-line discontinuation owing to toxicity or progression, patients could move to the second-line treatment. There was no subsequent-line treatment if patients experienced second intolerance or progression. Similarly, death could occur at any point in the model (Fig 5).

Concerning the time horizons of included studies, varying between 3 years and lifetime, 4 studies (7%), 9 studies (16%), 21 studies (38%), and 14 studies (25%) utilized the time horizons of < 5 years, 5–10 years, 10–20 years (including 20 years), and lifetime, respectively. Seven studies (13%) did not report a time horizon. It was noteworthy that 5 years [37], 6 years [58], 7 years [53], and 8 years [39] (each  $n = 1$ ), 10 years ( $n = 8$ ) [22, 30, 40, 44, 47, 56, 57, 69], 14 years ( $n = 3$ ) [15, 16, 60], 15 years ( $n = 1$ ) [64], and 20 years ( $n = 3$ ) [36, 61, 63], were assumed to equal a horizon of lifetime by researchers. Cycle lengths of 1 month ( $n = 27$ , 49%), 3 weeks ( $n = 8$ , 15%), 4 weeks ( $n = 8$ , 15%), 1 week ( $n = 6$ , 11%), and 2 weeks ( $n = 1$ , 2%), were adopted for included models. No cycle length was identified for six studies (11%). Discount rates of 1.5%, 2%, 3%, 3.5%, and 5% for health effects and costs were reported in this review.

**Clinical effectiveness inputs.** Table F in S1 Appendix summarized the clinical effectiveness inputs of identified models. Thirty-four studies (62%) used aggregate data from randomized controlled trials (RCTs) as evidence sources for clinical effectiveness, followed by individual patient data (IPD) from RCTs ( $n = 13$ , 24%), IPD from real-world data (RWD,  $n = 4$ , 7%) [19, 31, 34, 48], combinations of IPD and aggregate data from RCTs ( $n = 3$ , 5%) [27, 64, 68], and combination of IPD from RWD and aggregate data from RCT ( $n = 1$ , 2%) [17]. Of these studies, eight (15%) applied network meta-analyses to indirectly compare the key treatment efficacy using RCT aggregate data [20–22, 24, 40], RCT IPD [63, 69], and combination of RCT IPD and aggregate data [27].

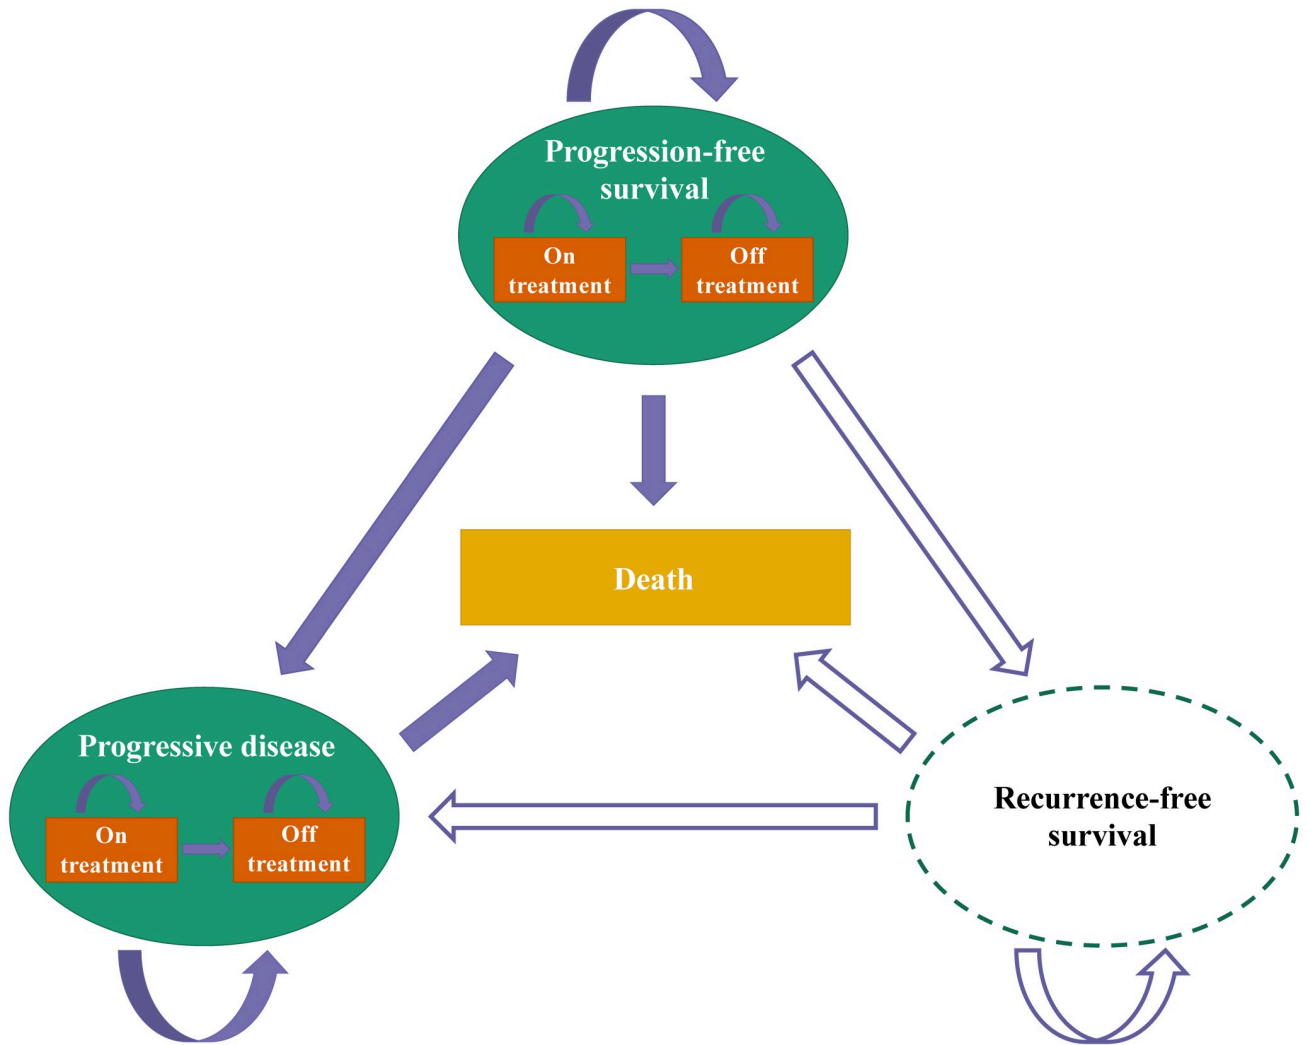

**Fig 3. The health-state-driven structure of health economic advanced HCC models.**

<https://doi.org/10.1371/journal.pone.0292239.g003>

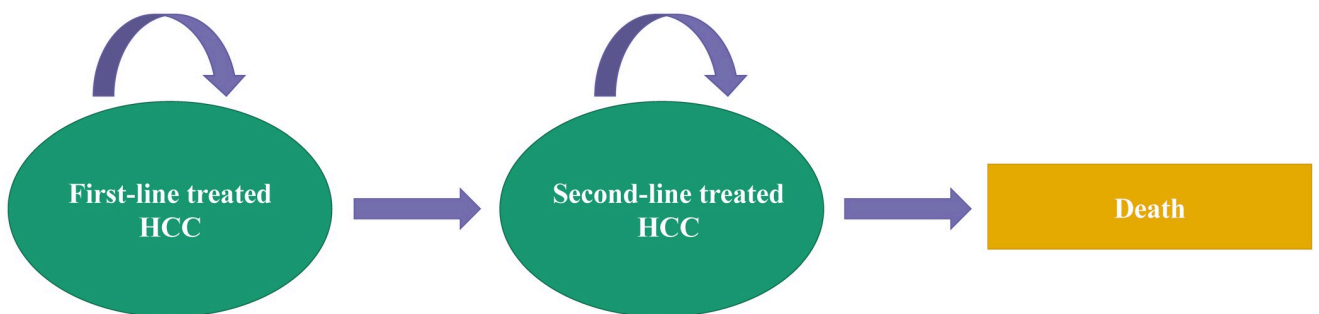

**Fig 4. The treatment-line-driven structure of health economic advanced HCC models.**

<https://doi.org/10.1371/journal.pone.0292239.g004>

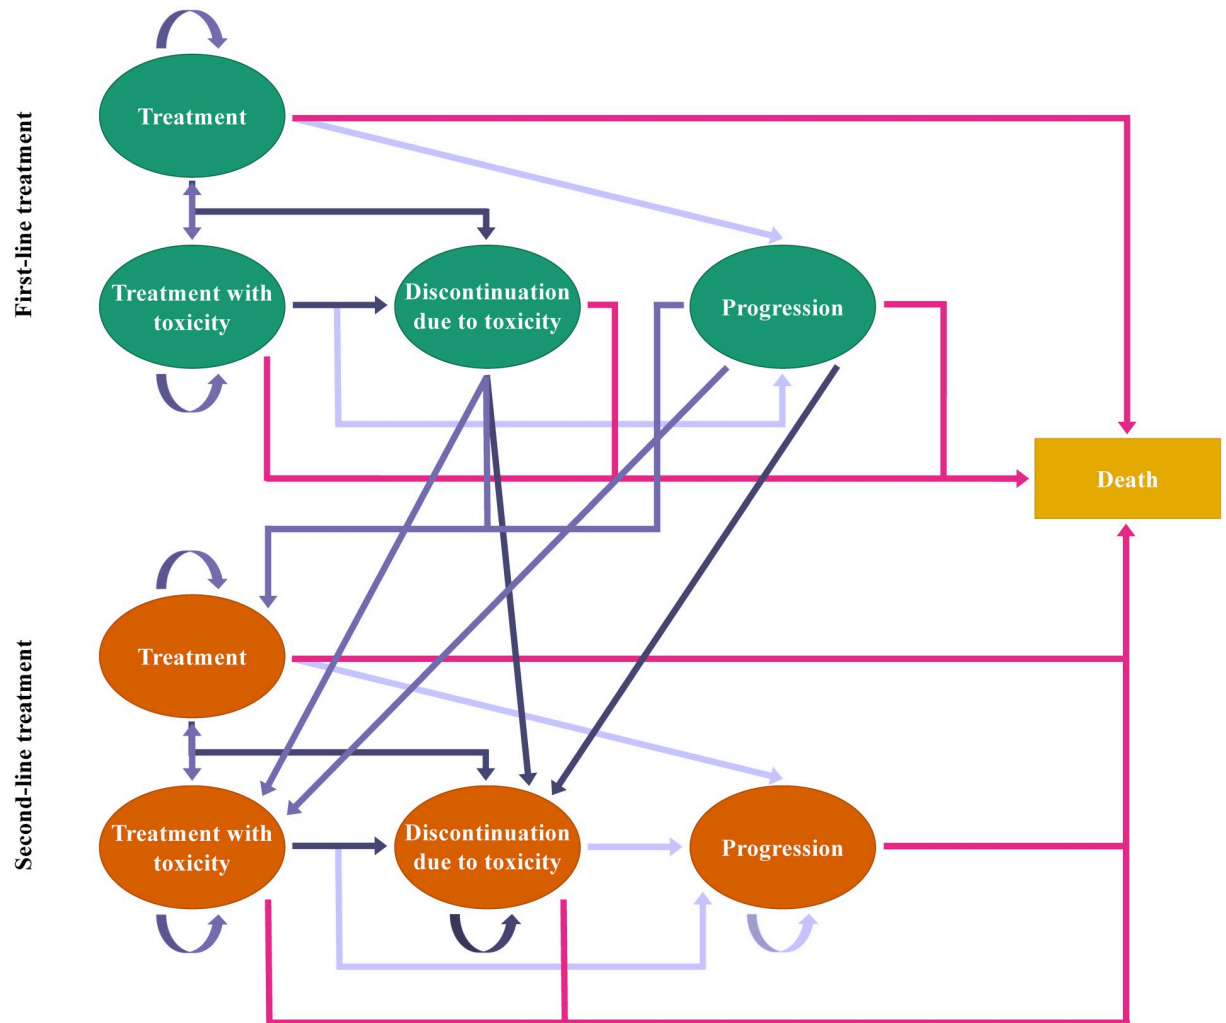

**Fig 5. The combination structure of health economic advanced HCC models.**

<https://doi.org/10.1371/journal.pone.0292239.g005>

Thirty-nine studies (71%) extrapolated or modelled base-case time-to-event data using parametric distributions. For PFS extrapolation, the lognormal distribution was the most commonly adopted ( $n = 21$ , 38%), followed by the Weibull distribution ( $n = 11$ , 20%), log-logistic distribution ( $n = 6$ , 11%), generalised gamma [61, 66] and Royston-Parma spline models [35, 55] (each  $n = 2$ , 4%), and an exponential function ( $n = 1$ , 2%) [42]. Similarly, parametric extrapolations for overall survival (OS) were identified as follows: lognormal ( $n = 19$ , 35%), log-logistic ( $n = 14$ , 25%), Weibull ( $n = 13$ , 24%), generalised gamma [68], and exponential [50] (each  $n = 1$ , 2%) distributions. Moreover, in seven studies (13%), the appropriate fitting distributions were selected for survival curves of one of the treatment arms, and then the extrapolated survival curves of other arms were adjusted on the basis of HRs derived from comparisons between treatment arms [20–22, 24, 25, 27, 40]. Of these studies, most reported the treatment efficacy by conducting network meta-analyses [20–22, 24, 27, 40].

Additionally, only one study used external RWD to extrapolate the OS [33]. In Chiang et al., survival curves were parametric in base-case analysis; however, the Surveillance, Epidemiology, and End Results (SEER) data were utilized to extrapolate the OS after 17 months in

the atezolizumab-bevacizumab arm in scenario analysis [33]. In terms of calibration of survival extrapolation, in NICE TA 474 and Saiyed et al., authors used external RWD of the matched GIDEON data and Australian Cancer Database to calibrate the OS extrapolations [47, 60].

Generally, in advanced HCC models, transition probabilities (n = 29, 53%) in Markov models and survival functions (n = 27, 49%) in partitioned survival models informed HCC progression (i.e. distribution of patients in each state in each cycle, Table 4). Concerning the transition probabilities, several approaches were adopted for those calculations in the included Markov models. Parametric survival modelling was the most frequently used method (n = 13, 24%), while model calibration (n = 2, 4%) [41, 56] and non-parametric count method (n = 1, 2%) [48] were also involved. In order to estimate the time-dependent transition probabilities in cancer models, the assumptions of parametric distributions for survival data were usually required. The Weibull distribution was often chosen since it belonged to the continuous probability distribution, of which the survival function parameters were then employed for deriving transition probabilities [70]. Five models using parametric survival modelling methods reported the following formulas of transition probabilities based on Weibull distribution:

$$TP(t) = 1 - \exp[\lambda(t - u)^\gamma - \lambda t^\gamma],$$

$\lambda$  = scale parameter of Weibull distribution,  $\gamma$  = shape parameter of Weibull distribution,  $u$  = cycle length [30]; on this basis, a simplified formula was derived:

$$TP = 1 - e^{-R}, R = -\ln[0.5]/(\text{time to event}/\text{number of treatment cycles})$$

[17, 34, 57, 59].

The remaining 24 Markov models did not clarify how the transition probabilities were obtained. Furthermore, for reducing calculation, the probability from PFS state to death was commonly assumed to be the natural mortality in most models, and the constant transition probabilities over time were even assumed in 10 ones [17–19, 34, 41, 45, 48, 56, 57, 59].

**Utility and cost inputs.** Table G in S1 Appendix presented the utility and cost inputs of identified models. Two approaches were reported for utility modelling (Table 5). A total of 51 studies (93%) adopted the state-based approach, whereas only one study (2%) modelled utilities through the proximity to death approach in base-case analysis [63]. The studies using a state-based approach defined the utilities of PFS and PD states. One study pursued the following time-to-death intervals when applying this approach: > 30 weeks, > 15 to ≤ 30 weeks, > 5 to ≤ 15 weeks, and ≤ 5 weeks before death [63].

The utilities of 0.76 and 0.68 used for PFS and PD states were the most common values for advanced HCC models (n = 27, 49%), and the pCODR Review Team considered these utility values more appropriate for the advanced HCC patient population [66]. In 17 studies (31%), utility values were equivalent across the treatment arms, since there was a lack of exploration for differentiation possibility or consideration for disutility of adverse events in base-case or scenario analysis. Thirty-three studies (60%) assumed different utilities across the treatment arms by means of applying the disutilities of adverse events or differentiating the values of base utility. Additionally, one study (2%) also used age adjustment to utility values [64].

With regard to the sources of utility, 33 studies (60%) generated the utility values only from published literature. Fifteen studies (27%) applied the EQ-5D utilities obtained in the trials, of which one (2%) used the adjusted EQ-5D data from REFLECT to reflect Japan-specific utilities [36]. Two studies (4%) involved the FACT-Hep data collected during clinical trials [45, 60] and one (2%) reported the use of SF-6D data from Chinese HCC patients [48].

The majority of studies applied the healthcare system perspective in base-case analyses (n = 28, 51%), followed by the payer (n = 22, 40%), societal (n = 4, 7%) [18, 40, 57, 67], hospital

**Table 4. The methods of HCC progression across included decision models.**

| Study                        | Methods of HCC progression                                                                                                                                                                                                                                                                                                                                                                                                                              |
|------------------------------|---------------------------------------------------------------------------------------------------------------------------------------------------------------------------------------------------------------------------------------------------------------------------------------------------------------------------------------------------------------------------------------------------------------------------------------------------------|
| Cabibbo et al. (2020) [28]   | TPs                                                                                                                                                                                                                                                                                                                                                                                                                                                     |
| Cabibbo et al. (2022) [29]   | TPs                                                                                                                                                                                                                                                                                                                                                                                                                                                     |
| Cai et al. (2020) [30]       | TPs<br>Approach used to estimate TPs: survival modelling<br>$TP(t) = 1 - \exp[\lambda(t - u)^\gamma - \lambda t^\gamma]$<br>$\lambda$ = scale parameter, $\gamma$ = shape parameter, $u$ = cycle length                                                                                                                                                                                                                                                 |
| Camma et al. (2013) [31]     | TPs<br>Approach used to estimate TPs: survival modelling                                                                                                                                                                                                                                                                                                                                                                                                |
| Carr et al. (2010) [15]      | TPs                                                                                                                                                                                                                                                                                                                                                                                                                                                     |
| Chiang et al. (2020) [32]    | TPs                                                                                                                                                                                                                                                                                                                                                                                                                                                     |
| Chiang et al. (2021) [33]    | TPs                                                                                                                                                                                                                                                                                                                                                                                                                                                     |
| Elsisi et al. (2019) [19]    | TPs<br>Sorafenib:<br>PFS-PD: 0.157 (0.125–0.188)<br>PFS-death: 0.002 (0.002–0.003)<br>PD-death: 0.500 (0.400–0.600)<br>BSC:<br>PFS-PD: 0.290 (0.232–0.349)<br>PFS-death: 0.002 (0.002–0.003)<br>PD-death: 0.219 (0.175–0.263)<br>Distribution: gamma                                                                                                                                                                                                    |
| Guan et al. (2022) [20]      | Survival functions                                                                                                                                                                                                                                                                                                                                                                                                                                      |
| Gupta et al. (2019) [18]     | TPs<br>Sorafenib:<br>PFS-PD: 0.179 (95% CI: 0.158–0.199)<br>PFS-death: 0.004 (95% CI: 0.003–0.004)<br>PD-death: 0.375 (95% CI: 0.333–0.417)<br>BSC:<br>PFS-PD: 0.357 (95% CI: 0.317–0.398)<br>PFS-death: 0.004 (95% CI: 0.003–0.004)<br>PD-death: 0.412 (95% CI: 0.262–0.328)<br>Distribution: beta                                                                                                                                                     |
| Ho et al. (2018) [34]        | TPs<br>Approach used to estimate TPs: survival modelling<br>$TP(1\text{ month}) = 1 - (0.5)^{(1/\text{median time to event})}$<br>derived from:<br>$TP = 1 - e^{-R}$ , $R = -\ln[0.5]/(\text{time to event}/\text{number of treatment cycles})$<br>Sorafenib monotherapy:<br>PFS-PD: 0.2264<br>PFS-death: 0.1097<br>PD-death: 0.1912<br>Sorafenib combination therapy:<br>PFS-PD: 0.1399<br>PFS-death: 0.0739<br>PD-death: 0.1447<br>Distribution: beta |
| Hou et al. (2020) [35]       | Survival functions                                                                                                                                                                                                                                                                                                                                                                                                                                      |
| Ikeda et al. (2021) [36]     | Survival functions                                                                                                                                                                                                                                                                                                                                                                                                                                      |
| Kim et al. (2020) [37]       | TPs<br>Approach used to estimate TPs: survival modelling                                                                                                                                                                                                                                                                                                                                                                                                |
| Kobayashi et al. (2019) [38] | Survival functions                                                                                                                                                                                                                                                                                                                                                                                                                                      |
| Li et al. (2021) [39]        | TPs<br>Approach used to estimate TPs: survival modelling                                                                                                                                                                                                                                                                                                                                                                                                |
| Li et al. (2022) [24]        | Survival functions                                                                                                                                                                                                                                                                                                                                                                                                                                      |
| Li et al. (2022) [40]        | Survival functions                                                                                                                                                                                                                                                                                                                                                                                                                                      |

(Continued)

**Table 4.** (Continued)

| Study                       | Methods of HCC progression                                                                                                                                                                                                                                                                                                                                                                                                                                                                                                                                                                                                                                                                                                                                                                                                                                                                                                                                                                                                                                                                                                                                                           |
|-----------------------------|--------------------------------------------------------------------------------------------------------------------------------------------------------------------------------------------------------------------------------------------------------------------------------------------------------------------------------------------------------------------------------------------------------------------------------------------------------------------------------------------------------------------------------------------------------------------------------------------------------------------------------------------------------------------------------------------------------------------------------------------------------------------------------------------------------------------------------------------------------------------------------------------------------------------------------------------------------------------------------------------------------------------------------------------------------------------------------------------------------------------------------------------------------------------------------------|
| Liao et al. (2019) [41]     | TPs<br>Approach used to estimate TPs: model calibration<br>Cabozantinib:<br>PFS-PD: 0.091 (0.0637-0.1183)<br>PFS-death: 0.054 (0.0378-0.0702)<br>PD-death: 0.083 (0.0581-0.1079)<br>BSC:<br>PFS-PD: 0.218 (0.1526-0.2834)<br>PFS-death: 0.082 (0.0574-0.1066)<br>PD-death: 0.093 (0.0651-0.1209)                                                                                                                                                                                                                                                                                                                                                                                                                                                                                                                                                                                                                                                                                                                                                                                                                                                                                     |
| Liu et al. (2022) [42]      | TPs and survival functions<br>Approach used to estimate TPs: survival modelling                                                                                                                                                                                                                                                                                                                                                                                                                                                                                                                                                                                                                                                                                                                                                                                                                                                                                                                                                                                                                                                                                                      |
| Meng et al. (2021) [43]     | TPs and survival functions<br>Approach used to estimate TPs: survival modelling                                                                                                                                                                                                                                                                                                                                                                                                                                                                                                                                                                                                                                                                                                                                                                                                                                                                                                                                                                                                                                                                                                      |
| Meng et al. (2022) [23]     | Survival functions                                                                                                                                                                                                                                                                                                                                                                                                                                                                                                                                                                                                                                                                                                                                                                                                                                                                                                                                                                                                                                                                                                                                                                   |
| Meng et al. (2022) [21]     | Survival functions                                                                                                                                                                                                                                                                                                                                                                                                                                                                                                                                                                                                                                                                                                                                                                                                                                                                                                                                                                                                                                                                                                                                                                   |
| Meyers et al. (2021) [44]   | Survival functions                                                                                                                                                                                                                                                                                                                                                                                                                                                                                                                                                                                                                                                                                                                                                                                                                                                                                                                                                                                                                                                                                                                                                                   |
| Muszbek et al. (2008) [16]  | TPs                                                                                                                                                                                                                                                                                                                                                                                                                                                                                                                                                                                                                                                                                                                                                                                                                                                                                                                                                                                                                                                                                                                                                                                  |
| NICE TA 474 (2017) [60]     | TPs<br>Approach used to estimate TPs: survival modelling                                                                                                                                                                                                                                                                                                                                                                                                                                                                                                                                                                                                                                                                                                                                                                                                                                                                                                                                                                                                                                                                                                                             |
| NICE TA 551 (2018) [61]     | Survival functions                                                                                                                                                                                                                                                                                                                                                                                                                                                                                                                                                                                                                                                                                                                                                                                                                                                                                                                                                                                                                                                                                                                                                                   |
| NICE TA 555 (2019) [62]     | Survival functions                                                                                                                                                                                                                                                                                                                                                                                                                                                                                                                                                                                                                                                                                                                                                                                                                                                                                                                                                                                                                                                                                                                                                                   |
| NICE TA 666 (2020) [63]     | Survival functions                                                                                                                                                                                                                                                                                                                                                                                                                                                                                                                                                                                                                                                                                                                                                                                                                                                                                                                                                                                                                                                                                                                                                                   |
| NICE TA 849 (2022) [64]     | Survival functions                                                                                                                                                                                                                                                                                                                                                                                                                                                                                                                                                                                                                                                                                                                                                                                                                                                                                                                                                                                                                                                                                                                                                                   |
| Parikh et al. (2017) [45]   | TPs<br>Assumed constant HCC progression rates over time                                                                                                                                                                                                                                                                                                                                                                                                                                                                                                                                                                                                                                                                                                                                                                                                                                                                                                                                                                                                                                                                                                                              |
| pCODR 10119 (2018) [65]     | Survival functions                                                                                                                                                                                                                                                                                                                                                                                                                                                                                                                                                                                                                                                                                                                                                                                                                                                                                                                                                                                                                                                                                                                                                                   |
| pCODR 10134 (2018) [66]     | Survival functions                                                                                                                                                                                                                                                                                                                                                                                                                                                                                                                                                                                                                                                                                                                                                                                                                                                                                                                                                                                                                                                                                                                                                                   |
| pCODR 10175 (2019) [67]     | Survival functions                                                                                                                                                                                                                                                                                                                                                                                                                                                                                                                                                                                                                                                                                                                                                                                                                                                                                                                                                                                                                                                                                                                                                                   |
| pCODR 10186 (2020) [68]     | Survival functions                                                                                                                                                                                                                                                                                                                                                                                                                                                                                                                                                                                                                                                                                                                                                                                                                                                                                                                                                                                                                                                                                                                                                                   |
| pCODR 10217 (2020) [69]     | Survival functions                                                                                                                                                                                                                                                                                                                                                                                                                                                                                                                                                                                                                                                                                                                                                                                                                                                                                                                                                                                                                                                                                                                                                                   |
| Peng et al. (2022) [25]     | TPs                                                                                                                                                                                                                                                                                                                                                                                                                                                                                                                                                                                                                                                                                                                                                                                                                                                                                                                                                                                                                                                                                                                                                                                  |
| Qin et al. (2018) [46]      | TPs                                                                                                                                                                                                                                                                                                                                                                                                                                                                                                                                                                                                                                                                                                                                                                                                                                                                                                                                                                                                                                                                                                                                                                                  |
| Saiyed et al. (2020) [47]   | Survival functions                                                                                                                                                                                                                                                                                                                                                                                                                                                                                                                                                                                                                                                                                                                                                                                                                                                                                                                                                                                                                                                                                                                                                                   |
| Sangmala et al. (2018) [48] | TPs<br>Approach used to estimate TPs: non-parametric count method<br>Sorafenib:<br>1 <sup>st</sup> line no progression-1 <sup>st</sup> line no progression: 0.4227 ± 0.0309<br>1 <sup>st</sup> line no progression-1 <sup>st</sup> line continued post progression: 0.2088 ± 0.0203<br>1 <sup>st</sup> line no progression-palliative care: 0.1955 ± 0.0198<br>1 <sup>st</sup> line no progression-death: 0.1731<br>1 <sup>st</sup> line continued post progression-1 <sup>st</sup> line continued post progression: 0.4451<br>1 <sup>st</sup> line continued post progression-palliative care: 0.4152 ± 0.0616<br>1 <sup>st</sup> line continued post progression-death: 0.5848<br>Palliative care-palliative care: 0.4152 ± 0.0616<br>Palliative care-death: 0.1397 ± 0.0096<br>Palliative care:<br>1 <sup>st</sup> line no progression-1 <sup>st</sup> line no progression: 0.7330<br>1 <sup>st</sup> line no progression-palliative care post-progression: 0.1520 ± 0.0026<br>1 <sup>st</sup> line no progression-death: 0.1150 ± 0.0045<br>Palliative care post-progression-palliative care post-progression: 0.7808<br>Palliative care post-progression-death: 0.2192 ± 0.0030 |
| Sherrow et al. (2020) [49]  | TPs                                                                                                                                                                                                                                                                                                                                                                                                                                                                                                                                                                                                                                                                                                                                                                                                                                                                                                                                                                                                                                                                                                                                                                                  |

(Continued)

**Table 4.** (Continued)

| Study                                  | Methods of HCC progression                                                                                                                                                                                                                                                                                                                                                                                                                                    |
|----------------------------------------|---------------------------------------------------------------------------------------------------------------------------------------------------------------------------------------------------------------------------------------------------------------------------------------------------------------------------------------------------------------------------------------------------------------------------------------------------------------|
| Shi et al. (2021) [50]                 | Survival functions                                                                                                                                                                                                                                                                                                                                                                                                                                            |
| Shlomain et al. (2018) [51]            | TPs<br>Approach used to estimate TPs: survival modelling                                                                                                                                                                                                                                                                                                                                                                                                      |
| Shlomain et al. (2019) [52]            | TPs<br>Approach used to estimate TPs: survival modelling                                                                                                                                                                                                                                                                                                                                                                                                      |
| Sieg et al. (2020) [53]                | TPs<br>PFS-PFS : $e^{-\frac{y_{PFS}}{\text{number of treatment cycles}}}$<br>PFS-death : $1 - e^{-\frac{y_{OS}}{\text{number of treatment cycles}}}$<br>PD-death : $1 - e^{-\frac{y_{OS}-y_{PFS}}{\text{number of treatment cycles}}}$                                                                                                                                                                                                                        |
| Soto-Perez-de-Celis et al. (2019) [54] | -                                                                                                                                                                                                                                                                                                                                                                                                                                                             |
| Su et al. (2021) [55]                  | Survival functions                                                                                                                                                                                                                                                                                                                                                                                                                                            |
| Wen et al. (2021) [56]                 | TPs<br>Approach used to estimate TPs: model calibration<br>Atezolizumab-bevacizumab:<br>PFS-PD: 0.0656<br>PFS-death: 0.0263<br>PD-death: 0.0495<br>Sorafenib:<br>PFS-PD: 0.1159<br>PFS-death: 0.0398<br>PD-death: 0.0813                                                                                                                                                                                                                                      |
| Zhang et al. (2015) [17]               | TPs<br>Approach used to estimate TPs: survival modelling<br>$TP(1\text{ month}) = 1 - (0.5)^{(1/\text{median time to event})}$<br>derived from:<br>$TP = 1 - e^{-R}$ , $R = -\ln[0.5]/(\text{time to event}/\text{number of treatment cycles})$<br>Sorafenib:<br>PFS-PD: 0.143<br>PFS-death: 0.083<br>PD-death: 0.180<br>BSC:<br>PFS-PD: 0.390<br>PFS-death: 0.152<br>PD-death: 0.219                                                                         |
| Zhang et al. (2016) [57]               | TPs<br>Approach used to estimate TPs: survival modelling<br>$TP(1\text{ month}) = 1 - (0.5)^{(1/\text{median time to event})}$<br>derived from:<br>$TP = 1 - e^{-R}$ , $R = -\ln[0.5]/(\text{time to event}/\text{number of treatment cycles})$<br>FOLFOX4:<br>PFS-PFS: 0.686<br>PFS-PD: 0.211<br>PFS-death: 0.103<br>PD-PD: 0.819<br>PD-death: 0.181<br>Sorafenib:<br>PFS-PFS: 0.680<br>PFS-PD: 0.219<br>PFS-death: 0.101<br>PD-PD: 0.829<br>PD-death: 0.171 |
| Zhang et al. (2021) [58]               | Survival functions                                                                                                                                                                                                                                                                                                                                                                                                                                            |
| Zhao et al. (2022) [22]                | Survival functions                                                                                                                                                                                                                                                                                                                                                                                                                                            |

(Continued)



Table 4. (Continued)

| Study                    | Methods of HCC progression                                                                                                                                                                                                                                                                                                                                                                                                                                      |
|--------------------------|-----------------------------------------------------------------------------------------------------------------------------------------------------------------------------------------------------------------------------------------------------------------------------------------------------------------------------------------------------------------------------------------------------------------------------------------------------------------|
| Zheng et al. (2020) [59] | TPs<br>Approach used to estimate TPs: survival modelling<br>$TP(1\text{ month}) = 1 - (0.5)^{(1/\text{median time to event})}$<br>derived from:<br>$TP = 1 - e^{-R}$ , $R = -\ln[0.5]/(\text{time to event}/\text{number of treatment cycles})$<br>Ramucirumab:<br>PFS-PFS: 0.703<br>PFS-PD: 0.219<br>PFS-death: 0.078<br>PD-PD: 0.885<br>PD-death: 0.115<br>Placebo:<br>PFS-PFS: 0.557<br>PFS-PD: 0.352<br>PFS-death: 0.091<br>PD-PD: 0.885<br>PD-death: 0.115 |
| Zhou et al. (2022) [26]  | Survival functions                                                                                                                                                                                                                                                                                                                                                                                                                                              |
| Zhou et al. (2022) [27]  | Survival functions                                                                                                                                                                                                                                                                                                                                                                                                                                              |

Abbreviations: BSC, best supportive care; HCC, hepatocellular carcinoma; NICE, National Institute for Health and Care Excellence; OS, overall survival; pCODR, pan-Canadian Oncology Drug Review; PD, progressive disease; PFS, progression-free survival; TA, technology appraisal; TPs, transition probabilities.

<https://doi.org/10.1371/journal.pone.0292239.t004>

[19], and patient [57] (each  $n = 1$ , 2%) perspectives. Most studies only considered direct medical costs ( $n = 46$ , 84%), whereas two studies (4%) also included indirect costs, such as salary or patient time loss, caregiver, and transportation costs [40, 57]. Costs of management of adverse events were considered in 47 studies (85%, Table 5).

**Sensitivity analyses and validation efforts.** The most common sensitivity analyses for advanced HCC models were one-way sensitivity analysis ( $n = 47$ , 85%), probabilistic sensitivity analysis ( $n = 49$ , 89%), and scenario analysis ( $n = 30$ , 55%). Other sensitivity analysis methods, including two-way sensitivity analysis and subgroup analysis, were reported by six studies (11%) and nine studies (16%), respectively (Table 3).

Five types of model validation were observed in 13 studies (24%). Face validity was the most frequently described validation effort ( $n = 12$ , 22%), followed by internal validity ( $n = 4$ , 7%) [31, 60, 63, 64], cross-validation ( $n = 3$ , 5%) [47, 63, 64], external validation ( $n = 3$ , 5%) [47, 60, 63], and calibration ( $n = 2$ , 4%, Table 3) [41, 56].

## Discussion

This systematic literature review was the first study to evaluate disease modelling for health economic evaluations of systemic therapies in advanced HCC, focusing on methodological characteristics and key challenges of decision models. This systematic analysis comprised modelling technique and structure, time horizon, cycle length, discounting, clinical effectiveness inputs, utility and cost inputs, sensitivity analyses, and validation efforts. It revealed wide variations of economic evaluation results in advanced HCC modelling studies, which could be attributed to marked differences in the adopted model approaches and assumptions. Consequently, the considerations and selections of (1) model structure and technique, (2) time horizon, cycle length and discounting, (3) clinical effectiveness inputs, (4) utility and cost inputs, (5) sensitivity analyses and validation efforts, (6) patient characteristics, (7) duration of

**Table 5. Key characteristics of utility and cost inputs.**

| Study                                  | Approach to utility modelling | Consideration of AEs in utility and cost inputs |
|----------------------------------------|-------------------------------|-------------------------------------------------|
| Cabibbo et al. (2020) [28]             | -                             | -                                               |
| Cabibbo et al. (2022) [29]             | -                             | -                                               |
| Cai et al. (2020) [30]                 | State based                   | Yes (disutility and cost)                       |
| Camma et al. (2013) [31]               | State based                   | No                                              |
| Carr et al. (2010) [15]                | -                             | Yes (cost)                                      |
| Chiang et al. (2020) [32]              | State based                   | Yes (disutility and cost)                       |
| Chiang et al. (2021) [33]              | State based                   | Yes (disutility and cost)                       |
| Elsisi et al. (2019) [19]              | State based                   | Yes (cost)                                      |
| Guan et al. (2022) [20]                | State based                   | Yes (disutility and cost)                       |
| Gupta et al. (2019) [18]               | State based                   | Yes (cost)                                      |
| Ho et al. (2018) [34]                  | State based                   | No                                              |
| Hou et al. (2020) [35]                 | State based                   | Yes (disutility and cost)                       |
| Ikeda et al. (2021) [36]               | State based                   | Yes (cost)                                      |
| Kim et al. (2020) [37]                 | State based                   | Yes (disutility and cost)                       |
| Kobayashi et al. (2019) [38]           | State based                   | Yes (disutility and cost)                       |
| Li et al. (2021) [39]                  | State based                   | Yes (disutility and cost)                       |
| Li et al. (2022) [24]                  | State based                   | Yes (disutility and cost)                       |
| Li et al. (2022) [40]                  | State based                   | Yes (disutility and cost)                       |
| Liao et al. (2019) [41]                | State based                   | Yes (cost)                                      |
| Liu et al. (2022) [42]                 | State based                   | Yes (disutility and cost)                       |
| Meng et al. (2021) [43]                | State based                   | Yes (cost)                                      |
| Meng et al. (2022) [23]                | State based                   | Yes (disutility and cost)                       |
| Meng et al. (2022) [21]                | State based                   | Yes (disutility and cost)                       |
| Meyers et al. (2021) [44]              | State based                   | Yes (cost)                                      |
| Muszbek et al. (2008) [16]             | -                             | Yes (cost)                                      |
| NICE TA 474 (2017) [60]                | State based                   | Yes (disutility and cost)                       |
| NICE TA 551 (2018) [61]                | State based                   | No/NR                                           |
| NICE TA 555 (2019) [62]                | State based                   | Yes (disutility and cost)                       |
| NICE TA 666 (2020) [63]                | TTD or State based            | Yes (disutility and cost)                       |
| NICE TA 849 (2022) [64]                | State based                   | Yes (disutility and cost)                       |
| Parikh et al. (2017) [45]              | State based                   | Yes (disutility and cost)                       |
| pCODR 10119 (2018) [65]                | State based                   | Yes (disutility and cost)                       |
| pCODR 10134 (2018) [66]                | State based                   | Yes (disutility and cost)                       |
| pCODR 10175 (2019) [67]                | State based                   | Yes (disutility and cost)                       |
| pCODR 10186 (2020) [68]                | State based                   | No/NR                                           |
| pCODR 10217 (2020) [69]                | State based                   | Yes (disutility and No/NR)                      |
| Peng et al. (2022) [25]                | State based                   | Yes (disutility and cost)                       |
| Qin et al. (2018) [46]                 | State based                   | Yes (cost)                                      |
| Saiyed et al. (2020) [47]              | State based                   | Yes (disutility and cost)                       |
| Sangmala et al. (2018) [48]            | State based                   | Yes (cost)                                      |
| Sherrow et al. (2020) [49]             | State based                   | No/NR                                           |
| Shi et al. (2021) [50]                 | State based                   | Yes (cost)                                      |
| Shlomain et al. (2018) [51]            | State based                   | Yes (disutility and cost)                       |
| Shlomain et al. (2019) [52]            | State based                   | Yes (disutility and cost)                       |
| Sieg et al. (2020) [53]                | State based                   | Yes (disutility and cost)                       |
| Soto-Perez-de-Celis et al. (2019) [54] | State based                   | Yes (disutility and cost)                       |

(Continued)

**Table 5.** (Continued)

| Study                    | Approach to utility modelling | Consideration of AEs in utility and cost inputs |
|--------------------------|-------------------------------|-------------------------------------------------|
| Su et al. (2021) [55]    | State based                   | Yes (disutility and cost)                       |
| Wen et al. (2021) [56]   | State based                   | Yes (cost)                                      |
| Zhang et al. (2015) [17] | State based                   | Yes (cost)                                      |
| Zhang et al. (2016) [57] | State based                   | Yes (cost)                                      |
| Zhang et al. (2021) [58] | State based                   | Yes (cost)                                      |
| Zhao et al. (2022) [22]  | State based                   | Yes (disutility and cost)                       |
| Zheng et al. (2020) [59] | State based                   | Yes (cost)                                      |
| Zhou et al. (2022) [26]  | State based                   | Yes (disutility and cost)                       |
| Zhou et al. (2022) [27]  | State based                   | Yes (disutility and cost)                       |

Abbreviations: AE, adverse event; NICE, National Institute for Health and Care Excellence; NR, not reported; pCODR, pan-Canadian Oncology Drug Review; TA, technology appraisal; TTD, time to death.

<https://doi.org/10.1371/journal.pone.0292239.t005>

treatment, and (8) switch, were discussed in this section. The key recommendations proposed across the discussion are summarized in [Table 6](#).

### Model structure and technique

Most advanced HCC models used the traditional three health states of PFS, PD, and death to define their structures. However, applying such a structure would be problematic if the models were to consider conditional outcomes and treatment sequences. Most health-state-driven models accounted for all subsequent therapy in a PD state, implying patients received the same treatment after disease progression until death. This assumption did not reflect the clinical practice, and stronger ones were required for modelling downstream treatments. Thus, combining treatment-line-driven structure could be more realistic in simulating treatment pathways.

In the economic evaluations for oncology therapies, the dominant decision analysis models involved Markov and partitioned survival models, which were the only techniques for modelling the health and economic outcomes in included publications and TAs. However, when considering multiple adverse events and different treatment lines, a number of assumptions and model states were required, which would contribute to greatly untransparent and complex models. Therefore, it is more suggested to adopt patient-level modelling techniques including patient-level long short-term memory or discrete event simulation. Specially, discrete event simulation could provide flexibility in the fields of event timing, competing event handling, and model structure, leading to a preferable reflection of clinical practice. Patient-level techniques, however, were widely regarded as more time consuming and complex, and there was lack of guidance for model implementation.

### Time horizon, cycle length, and discounting

Time horizons, cycle lengths, and discount rates differed between studies in this review. NICE guideline for TA recommends that the health economic model should adopt a sufficiently long time horizon to evaluate all significant differences in benefits and survivals between compared treatments [71]. When alternative treatments impact outcomes or costs that persist throughout a patient's remaining life, a horizon of lifetime is usually required [71]. In addition, the cycle length is generally accepted to be consistent with the treatment cycle. The annual discount rate

**Table 6. Summary of key recommendations for disease modelling for health economic evaluations of systemic therapies in advanced HCC.**

| Category                        | Summary of recommendations                                                                                                                                                                                                                                                                                                                                                                                                 |
|---------------------------------|----------------------------------------------------------------------------------------------------------------------------------------------------------------------------------------------------------------------------------------------------------------------------------------------------------------------------------------------------------------------------------------------------------------------------|
| <b>General recommendations</b>  |                                                                                                                                                                                                                                                                                                                                                                                                                            |
| Reporting good practices        | To improve reporting good practices, especially for selection of extrapolation methods, decisions on measurement of effectiveness, identification of parameters used in sensitivity analysis and assumption of distributions or uncertainty for these parameters                                                                                                                                                           |
| Modelling good practices        | To improve modelling good practices, especially for definition of model structure that reflects the clinical practice, selection of modelling technique that matches the structure, explanation of time-to-event parameters (including distribution parameters and transition probabilities), selection of approach to utility modelling, presentation of methods of sensitivity analyses, utilization of model validation |
| <b>Specific recommendations</b> |                                                                                                                                                                                                                                                                                                                                                                                                                            |
| Model structure                 | To distinguish different treatment lines in the model structure to simulate more realistic treatment pathways                                                                                                                                                                                                                                                                                                              |
| Modelling technique             | To adopt the patient-level modelling technique if available which can provide flexibility in the fields of event timing, competing event handling, and model structure                                                                                                                                                                                                                                                     |
| Time horizon                    | To use a lifetime horizon                                                                                                                                                                                                                                                                                                                                                                                                  |
| Extrapolation                   | To appropriately adopt external data and trial data-based parametric distribution for OS extrapolation to balance the external and internal validity                                                                                                                                                                                                                                                                       |
| Utility inputs                  | To consider the quality of available data when selecting utility modelling approach, and to consider the disutilities of adverse events                                                                                                                                                                                                                                                                                    |
| Heterogeneity                   | To analyze relevant identifiable subgroups according to different patient characteristics                                                                                                                                                                                                                                                                                                                                  |
| Patient characteristics         | To evaluate the differences of patient characteristics, and to consider the modelling being more sensitive to these differences                                                                                                                                                                                                                                                                                            |
| Duration of treatment           | To model duration of treatment using time to discontinuation, when the Kaplan–Meier curve or IPD of time to discontinuation are available                                                                                                                                                                                                                                                                                  |
| Treatment switching             | To employ and define the most suitable adjustment method matching the corresponding assumptions, and to compare adjusted and actual OS curves visually                                                                                                                                                                                                                                                                     |

Abbreviations: HCC, hepatocellular carcinoma; IPD, individual patient data; OS, overall survival.

<https://doi.org/10.1371/journal.pone.0292239.t006>

changes over time and across jurisdictions, such as currently 3.5% recommended for UK [71], 5% for China [72], and 5% for Australia [73].

### Clinical effectiveness inputs

The research community seemed to hardly get access to IPD from industry-funded trials, which led to limitations in decision making, structure employed, and methods used. OS served as the critical parameter impacting on economic evaluation results, but its extrapolation was filled with challenges for the treatments associated with sustained responses. It was difficult to accurately model the OS only adopting parametric distributions based on trial data, since a plateau of the tail occurred in the sustained response-related OS curve. In accordance with guidelines of HTA, the extrapolation and plausibility of long-term survival can be informed and assessed using external data [74]. The external and internal validity are standardly balanced through trade-off between adopting external data and trial data-based parametric distribution. Importantly, the treatment options and patient population of external data should be assessed to coincide with that in the trial. We found only one study using SEER data for the extrapolation of OS in a pessimistic scenario [33]. Moreover, calibrating the extrapolation based on external data becomes a good practice. We identified two studies using RWD (i.e. the matched GIDEON data and Australian Cancer Database) for calibration of their parametric OS extrapolations [47, 60].

When adopting state transition models, there was a rising need for justifications of transition probabilities that were used between states. The most frequently used approach for cancer models in estimating transition probabilities was parametric survival modelling methods [75]. The maximum likelihood estimation was typically used during parametric survival functions fitting to IPD for estimations of survival function parameters, such as the shape and scale parameters of the Weibull distribution, which were employed to derive transition probabilities later. The transition probabilities of the interest events were defined as:

$$TP = 1 - S(t_i)/S(t_{i-1}),$$

S = survivor function,  $(t_{i-1}, t_i)$  = time interval [75].

In fact, most Markov models of systemic therapies in advanced HCC did not describe the calculation method or formula derivation process for transition probabilities, which could be associated with the major uncertainty and become one of the concerns in future models.

### Utility and cost inputs

Utility inputs significantly affect economic evaluation results. Given the utility models, the data quality has an important impact on the approach adopted. For instance, there should be enough patient samples in each proximity-to-death interval and the utility value should be validated for its face validity, if the time-to-death approach is taken. In NICE TA 666, the decision model defined the utilities based on time-to-death intervals, because this approach could drive a more refined division of health states compared with the state-based approach [63]. However, the evidence review groups from NICE did not clearly favor time-to-death or state-based utility models, and thus further evidence should be needed.

It was also worth noting that adverse events were generally served as an important part of the cost and utility in a treatment cycle, but seldom involved as separate events. Consequently, the costs of managing adverse events and disutilities of adverse events deserve attention and research in advanced HCC models.

### Sensitivity analyses and validation efforts

The studies provided limited details on the methodologies of sensitivity analyses, even though more than 90% of them reported one-way or probabilistic sensitivity analyses. Particularly in probabilistic analysis, identifying included parameters and quantifying uncertainty surrounding them were extremely important; otherwise, interpreting adopted confidence intervals was unlikely.

For only 13 studies, five types of validation were used in the publication, mainly being face validity of models and assumptions judged by experts. The validity and outcomes of models could be questioned if being a lack of model validation. Thus, future health economic models for advanced HCC need to better utilize the existing frameworks to reflect the validity of the models [76, 77].

### Patient characteristics

The differences in epidemiological and physiological characteristics, including age, sex, ethnicity, Eastern Cooperative Oncology Group performance status, etiology of disease, Child-Pugh class, Barcelona Clinic Liver Cancer (BCLC) stage, extrahepatic spread of disease, macrovascular invasion, alpha-fetoprotein concentration, and previous treatment history in patients diagnosed as advanced HCC, could result in needs for modelling which is more associated with these differences. Actually, the identified models rarely took this into consideration, and thus future studies were required to consider the modelling being more sensitive to the differences

of patient characteristics, and to categorize advanced HCC patients into different appropriate models based on different patient characteristics and evaluate them separately.

### Duration of treatment

There was an ongoing challenge to determine the optimal duration of systemic therapies for advanced HCC in clinical practice. Duration of treatment was modelled mostly adopting time to discontinuation and PFS. The data of time to discontinuation would be preferable against that of PFS, when the Kaplan–Meier curve or IPD of time to discontinuation were available. Otherwise, PFS could be considered as a proxy of time to discontinuation. However, given that patients might continue on previous treatment after disease progression, this approach might underestimate the treatment duration likely presented in clinical practice. Most advanced HCC models did not define the measure of treatment duration, and this concern should be solved in the future.

### Switch

Treatment switching due to disease progression or intolerance commonly occurred in the trials for advanced HCC and its pattern, namely proportion of switching and treatments, needed to be reflective of clinical practice in the analyzed jurisdiction. The majority of identified studies involved treatment switching, yet few presented the selected adjustment methods and rationales, implying poor quality for reporting the switching adjustment implementation [78]. A technical support document from NICE [79] and a publication [78] provided definitions and applications of various switching adjustment methods such as inverse probability of censoring weights and iterative parameter estimation algorithm. Future studies should employ the most suitable adjustment method matching the corresponding assumptions and visually comparing adjusted and actual OS curves [78, 79].

### Limitations

There were certain limitations in this review. Firstly, owing to the absence of a more appropriate alternative, we used the CHEERS 2022 checklist that was not designed to assess publication quality. The CHEERS checklist scores were not generally reflective of the modelling quality, since reporting on items did not actually represent that they were appropriately implemented. Secondly, some extracted data lacked definite data sources, model structures, assumptions, and adopted methods, and readers and researchers might not agree with these categorizations. To reduce such impact to the utmost extent, two other authors verified all the extracted information.

### Conclusions

Disease modelling for health economic evaluations of systemic therapies in advanced HCC has adopted various modelling approaches and assumptions, resulting in marked differences in economic evaluation results. It implied that there had been much uncertainty associated with cost-effectiveness of systemic therapies for HCC. By proposing methodological recommendations, we suggest that future model-based studies for health economic evaluation of HCC therapies should follow good modelling practice guidelines and improve modelling methods to generate reliable health and economic evidence, especially in definition of model structure that reflects the clinical practice, selection of modelling technique that matches the structure, explanation of time-to-event parameters, selection of approach to utility modelling, presentation of methods of sensitivity analyses, and utilization of model validation.

## Supporting information

**S1 Appendix. Supporting tables.**  
(DOCX)

**S1 Checklist. PRISMA 2020 checklist.**  
(DOCX)

## Author Contributions

**Conceptualization:** Huimin Zou, Hao Hu.

**Data curation:** Huimin Zou.

**Formal analysis:** Huimin Zou.

**Funding acquisition:** Hao Hu.

**Investigation:** Huimin Zou, Yan Xue, Xianwen Chen.

**Methodology:** Huimin Zou, Hao Hu.

**Project administration:** Huimin Zou.

**Software:** Huimin Zou.

**Supervision:** Hao Hu.

**Validation:** Huimin Zou, Yan Xue, Xianwen Chen, Hao Hu.

**Visualization:** Huimin Zou.

**Writing – original draft:** Huimin Zou.

**Writing – review & editing:** Huimin Zou, Yunfeng Lai, Dongning Yao, Carolina Oi Lam Ung, Hao Hu.

## References

1. Sung H, Ferlay J, Siegel RL, Laversanne M, Soerjomataram I, Jemal A, et al. Global cancer statistics 2020: GLOBOCAN estimates of incidence and mortality worldwide for 36 cancers in 185 countries. *CA: A Cancer Journal for Clinicians*. 2021; 71(3):209–49. <https://doi.org/10.3322/caac.21660> PMID: 33538338
2. Llovet JM, Kelley RK, Villanueva A, Singal AG, Pikarsky E, Roayaie S, et al. Hepatocellular carcinoma. *Nature Reviews Disease Primers*. 2021; 7(1):6. <https://doi.org/10.1038/s41572-020-00240-3> PMID: 33479224
3. Sagnelli E, Macera M, Russo A, Coppola N, Sagnelli C. Epidemiological and etiological variations in hepatocellular carcinoma. *Infection*. 2020; 48(1):7–17. <https://doi.org/10.1007/s15010-019-01345-y> PMID: 31347138
4. Yang JD, Hainaut P, Gores GJ, Amadou A, Plymoth A, Roberts LR. A global view of hepatocellular carcinoma: trends, risk, prevention and management. *Nature Review Gastroenterology & Hepatology*. 2019; 16(10):589–604. <https://doi.org/10.1038/s41575-019-0186-y> PMID: 31439937
5. Zou H, Ge Y, Lei Q, Ung COL, Ruan Z, Lai Y, et al. Epidemiology and disease burden of non-alcoholic steatohepatitis in greater China: a systematic review. *Hepatology International*. 2022; 16(1):27–37. <https://doi.org/10.1007/s12072-021-10286-4> PMID: 35098442
6. Zou H, Lei Q, Yan X, Lai Y, Ung COL, Hu H. Clinical outcomes associated with monotherapy and combination therapy of immune checkpoint inhibitors as first-line treatment for advanced hepatocellular carcinoma in real-world practice: a systematic literature review and meta-analysis. *Cancers (Basel)*. 2022; 15(1). <https://doi.org/10.3390/cancers15010260> PMID: 36612256
7. Lei Q, Yan X, Zou H, Jiang Y, Lai Y, Ung COL, et al. Efficacy and safety of monotherapy and combination therapy of immune checkpoint inhibitors as first-line treatment for unresectable hepatocellular

- carcinoma: a systematic review, meta-analysis and network meta-analysis. *Discover Oncology*. 2022; 13(1):95. <https://doi.org/10.1007/s12672-022-00559-1> PMID: 36171533
8. Zou H, Li M, Lei Q, Luo Z, Xue Y, Yao D, et al. Economic burden and quality of life of hepatocellular carcinoma in greater China: a systematic review. *Frontiers in Public Health*. 2022; 10:801981. <https://doi.org/10.3389/fpubh.2022.801981> PMID: 35530735
  9. Lang K, Danchenko N, Gondek K, Shah S, Thompson D. The burden of illness associated with hepatocellular carcinoma in the United States. *Journal of Hepatology*. 2009; 50(1):89–99. <https://doi.org/10.1016/j.jhep.2008.07.029> PMID: 18977551
  10. Matsumoto K, Wu Y, Kitazawa T, Fujita S, Seto K, Hasegawa T. Cost of illness of hepatocellular carcinoma in Japan: a time trend and future projections. *PLoS One*. 2018; 13(6):e0199188. <https://doi.org/10.1371/journal.pone.0199188> PMID: 29920556
  11. Likhitsup A, Parikh ND. Economic implications of hepatocellular carcinoma surveillance and treatment: a guide for clinicians. *Pharmacoeconomics*. 2020; 38(1):5–24. <https://doi.org/10.1007/s40273-019-00839-9> PMID: 31573053
  12. Page MJ, McKenzie JE, Bossuyt PM, Boutron I, Hoffmann TC, Mulrow CD, et al. The PRISMA 2020 statement: an updated guideline for reporting systematic reviews. *PLoS Medicine*. 2021; 18(3): e1003583. <https://doi.org/10.1371/journal.pmed.1003583> PMID: 33780438
  13. Liberati A, Altman DG, Tetzlaff J, Mulrow C, Gotzsche PC, Ioannidis JP, et al. The PRISMA statement for reporting systematic reviews and meta-analyses of studies that evaluate healthcare interventions: explanation and elaboration. *BMJ*. 2009; 339:b2700. <https://doi.org/10.1136/bmj.b2700> PMID: 19622552
  14. Husereau D, Drummond M, Augustovski F, de Bekker-Grob E, Briggs AH, Carswell C, et al. Consolidated Health Economic Evaluation Reporting Standards (CHEERS) 2022 Explanation and Elaboration: a report of the ISPOR CHEERS II Good Practices Task Force. *Value in Health*. 2022; 25(1):10–31. <https://doi.org/10.1016/j.jval.2021.10.008> PMID: 35031088
  15. Carr BI, Carroll S, Muszbek N, Gondek K. Economic evaluation of sorafenib in unresectable hepatocellular carcinoma. *Journal of Gastroenterology and Hepatology (Australia)*. 2010; 25(11):1739–46. <https://doi.org/10.1111/j.1440-1746.2010.06404.x> PMID: 21039835
  16. Muszbek N, Shah S, Carroll S, McDonald H, Dale P, Maroun J, et al. Economic evaluation of sorafenib in the treatment of hepatocellular carcinoma in Canada. *Current Medical Research and Opinion*. 2008; 24(12):3559–69. <https://doi.org/10.1185/03007990802563706> PMID: 19032137
  17. Zhang P, Yang Y, Wen F, He X, Tang R, Du Z, et al. Cost-effectiveness of sorafenib as a first-line treatment for advanced hepatocellular carcinoma. *European Journal of Gastroenterology and Hepatology*. 2015; 27(7):853–9. <https://doi.org/10.1097/MEG.0000000000000373> PMID: 25919775
  18. Gupta N, Verma RK, Prinja S, Dhiman RK. Cost-effectiveness of sorafenib for treatment of advanced hepatocellular carcinoma in India. *Journal of Clinical and Experimental Hepatology*. 2019; 9(4):468–75. <https://doi.org/10.1016/j.jceh.2018.10.003> PMID: 31516263
  19. H Elsis G, Nada Y, Rashad N, Carapinha J. Cost-effectiveness of sorafenib versus best supportive care in advanced hepatocellular carcinoma in Egypt. *Journal of Medical Economics*. 2019; 22(2):163–8. <https://doi.org/10.1080/13696998.2018.1552432> PMID: 30479174
  20. Guan H, Wang C, Zhao Z, Han S. Cost-effectiveness of donafenib as first-line treatment of unresectable hepatocellular carcinoma in China. *Advances in Therapy*. 2022; 39(7):3334–46. <https://doi.org/10.1007/s12325-022-02185-3> PMID: 35644019
  21. Meng R, Zhang X, Zhou T, Luo M, Qiu Y. Cost-effectiveness analysis of donafenib versus lenvatinib for first-line treatment of unresectable or metastatic hepatocellular carcinoma. *Expert Review of Pharmacoeconomics & Outcomes Research*. 2022; 22(7):1079–86.
  22. Zhao M, Pan X, Yin Y, Hu H, Wei J, Bai Z, et al. Cost-effectiveness analysis of five systemic treatments for unresectable hepatocellular carcinoma in China: an economic evaluation based on network meta-analysis. *Frontiers in Public Health*. 2022; 10:869960. <https://doi.org/10.3389/fpubh.2022.869960> PMID: 35493395
  23. Meng R, Cao Y, Zhou T, Hu H, Qiu Y. The cost effectiveness of donafenib compared with sorafenib for the first-line treatment of unresectable or metastatic hepatocellular carcinoma in China. *Frontiers in Public Health*. 2022; 10:794131. <https://doi.org/10.3389/fpubh.2022.794131> PMID: 35433574
  24. Li L, Yang S, Chen Y, Tian L, He Y, Wu B, et al. Immune checkpoint inhibitors plus an anti-VEGF antibody as the first-line treatment for unresectable hepatocellular carcinoma: a network meta-analysis and cost-effectiveness analysis. *Frontiers in Pharmacology*. 2022; 13:891008. <https://doi.org/10.3389/fphar.2022.891008> PMID: 35721168
  25. Peng Y, Zeng X, Peng L, Liu Q, Yi L, Luo X, et al. Sintilimab plus bevacizumab biosimilar versus sorafenib as first-line treatment for unresectable hepatocellular carcinoma: a cost-effectiveness analysis. *Frontiers in Pharmacology*. 2022; 13. <https://doi.org/10.3389/fphar.2022.778505> PMID: 35222020



26. Zhou T, Cao Y, Wang X, Yang L, Wang Z, Ma A, et al. Economic evaluation of sintilimab plus bevacizumab versus sorafenib as a first-line treatment for unresectable hepatocellular carcinoma. *Advances in Therapy*. 2022; 39(5):2165–77. <https://doi.org/10.1007/s12325-022-02079-4> PMID: 35296994
27. Zhou T, Wang X, Cao Y, Yang L, Wang Z, Ma A, et al. Cost-effectiveness analysis of sintilimab plus bevacizumab biosimilar compared with lenvatinib as the first-line treatment of unresectable or metastatic hepatocellular carcinoma. *BMC Health Services Research*. 2022; 22(1):1367. <https://doi.org/10.1186/s12913-022-08661-4> PMID: 36397064
28. Cabibbo G, Celsa C, Enea M, Battaglia S, Rizzo GEM, Grimaudo S, et al. Optimizing sequential systemic therapies for advanced hepatocellular carcinoma: a decision analysis. *Cancers*. 2020; 12(8):16. <https://doi.org/10.3390/cancers12082132> PMID: 32752060
29. Cabibbo G, Reig M, Celsa C, Torres F, Battaglia S, Enea M, et al. First-line immune checkpoint inhibitor-based sequential therapies for advanced hepatocellular carcinoma: rationale for future trials. *Liver Cancer*. 2022; 11(1):75–84. <https://doi.org/10.1159/000520278> PMID: 35222509
30. Cai H, Zhang L, Li N, Zheng B, Liu M. Lenvatinib versus sorafenib for unresectable hepatocellular carcinoma: a cost-effectiveness analysis. *Journal of Comparative Effectiveness Research*. 2020; 9(8):553–62. <https://doi.org/10.2217/cer-2020-0041> PMID: 32419473
31. Camma C, Cabibbo G, Petta S, Enea M, Iavarone M, Grieco A, et al. Cost-effectiveness of sorafenib treatment in field practice for patients with hepatocellular carcinoma. *Hepatology*. 2013; 57(3):1046–54. <https://doi.org/10.1002/hep.26221> PMID: 23299720
32. Chiang CL, Chan SK, Lee SF, Wong IOL, Choi HCW. Cost-effectiveness of pembrolizumab as a second-line therapy for hepatocellular carcinoma. *JAMA Network Open*. 2020; 4(1):e2033761.
33. Chiang CL, Chan SK, Lee SF, Choi HC. First-line atezolizumab plus bevacizumab versus sorafenib in hepatocellular carcinoma: a cost-effectiveness analysis. *Cancers (Basel)*. 2021; 13(5). <https://doi.org/10.3390/cancers13050931> PMID: 33668100
34. Ho JC, Hsieh ML, Chuang PH, Hsieh VC. Cost-effectiveness of sorafenib monotherapy and selected combination therapy with sorafenib in patients with advanced hepatocellular carcinoma. *Value in Health Regional Issues*. 2018; 15:120–6. <https://doi.org/10.1016/j.vhri.2017.12.012> PMID: 29704658
35. Hou Y, Wu B. Atezolizumab plus bevacizumab versus sorafenib as first-line treatment for unresectable hepatocellular carcinoma: a cost-effectiveness analysis. *Cancer Communications*. 2020; 40(12):743–5. <https://doi.org/10.1002/cac2.12110> PMID: 33159490
36. Ikeda S, Kudo M, Izumi N, Kobayashi M, Azuma M, Meier G, et al. Cost-effectiveness of lenvatinib in the treatment of patients with unresectable hepatocellular carcinomas in Japan: an analysis using data from Japanese patients in the REFLECT trial. *Value in Health Regional Issues*. 2021; 24:82–9. <https://doi.org/10.1016/j.vhri.2020.05.009> PMID: 33524900
37. Kim JJ, McFarlane T, Tully S, Wong WWL. Lenvatinib versus sorafenib as first-line treatment of unresectable hepatocellular carcinoma: a cost-utility analysis. *Oncologist*. 2020; 25(3):e512–e9. <https://doi.org/10.1634/theoncologist.2019-0501> PMID: 32162815
38. Kobayashi M, Kudo M, Izumi N, Kaneko S, Azuma M, Copher R, et al. Cost-effectiveness analysis of lenvatinib treatment for patients with unresectable hepatocellular carcinoma (uHCC) compared with sorafenib in Japan. *Journal of Gastroenterology*. 2019; 54(6):558–70. <https://doi.org/10.1007/s00535-019-01554-0> PMID: 30788569
39. Li M, Lin S, Wilson L, Huang P, Wang H, Lai S, et al. Cost-effectiveness analysis of hepatic arterial infusion of FOLFOX combined sorafenib for advanced hepatocellular carcinoma with portal vein invasion. *Frontiers in Oncology*. 2021; 11. <https://doi.org/10.3389/fonc.2021.562135> PMID: 33767976
40. Li Y, Liang X, Li H, Chen X. Atezolizumab plus bevacizumab versus nivolumab as first-line treatment for advanced or unresectable hepatocellular carcinoma: a cost-effectiveness analysis. *Cancer*. 2022; 128(22):3995–4003. <https://doi.org/10.1002/cncr.34457> PMID: 36111952
41. Liao W, Huang J, Hutton D, Zhu G, Wu Q, Wen F, et al. Cost-effectiveness analysis of cabozantinib as second-line therapy in advanced hepatocellular carcinoma. *Liver International*. 2019; 39(12):2408–16. <https://doi.org/10.1111/liv.14257> PMID: 31544330
42. Liu R, Qiu K, Jiang Y, Pang J. Economic evaluation of atezolizumab plus bevacizumab versus sorafenib in the first-line treatment of unresectable hepatocellular carcinoma. *China Pharmacist*. 2022; 25(5):825–31.
43. Meng R, Zhou T, Shi F, Wang Z, Luo M, Ma A. Cost-utility analysis of pembrolizumab in the second-line treatment of advanced hepatocellular carcinoma based on two models. *China Pharmacy*. 2021; 32(22):2761–6.
44. Meyers BM, Vogel A, Marotta P, Kavan P, Kamboj L, Pan J, et al. The cost-effectiveness of lenvatinib in the treatment of advanced or unresectable hepatocellular carcinoma from a Canadian perspective. *Canadian Journal of Gastroenterology and Hepatology*. 2021; 2021. <https://doi.org/10.1155/2021/8811018> PMID: 33681090

45. Parikh ND, Singal AG, Hutton DW. Cost effectiveness of regorafenib as second-line therapy for patients with advanced hepatocellular carcinoma. *Cancer*. 2017; 123(19):3725–31. <https://doi.org/10.1002/ncr.30863> PMID: 28662266
46. Qin S, Kruger E, Tan SC, Cheng S, Wang N, Liang J. Cost-effectiveness analysis of FOLFOX4 and sorafenib for the treatment of advanced hepatocellular carcinoma in China. *Cost Effectiveness and Resource Allocation*. 2018; 16(1). <https://doi.org/10.1186/s12962-018-0112-0> PMID: 30087583
47. Saiyed M, Byrnes J, Srivastava T, Scuffham P, Downes M. Cost-effectiveness of lenvatinib compared with sorafenib for the first-line treatment of advanced hepatocellular carcinoma in Australia. *Clinical Drug Investigation*. 2020; 40(12):1167–76. <https://doi.org/10.1007/s40261-020-00983-7> PMID: 33140194
48. Sangmala P, Lamlertthong W, Siri P, Jaroenpatarapesaj S. Economic evaluation of sorafenib treatment of patients with advanced hepatocellular carcinoma at Chulabhorn Hospital. *Journal of the Medical Association of Thailand*. 2018; 101(6):S171–S83.
49. Sherrow C, Attwood K, Zhou K, Mukherjee S, Iyer R, Fountzilias C. Sequencing systemic therapy pathways for advanced hepatocellular carcinoma: a cost effectiveness analysis. *Liver Cancer*. 2020; 9(5):549–62. <https://doi.org/10.1159/000508485> PMID: 33083280
50. Shi F, Meng R, Wang Z, Rui M, Shang Y, Ma A. Cost-effectiveness analysis of applying camrelizumab as second-line therapy for the treatment of advanced hepatocellular carcinoma. *Chinese Health Economics*. 2021; 40(2):62–5.
51. Shlomain A, Leshno M, Goldstein DA. Regorafenib treatment for patients with hepatocellular carcinoma who progressed on sorafenib-A cost-effectiveness analysis. *PLoS One*. 2018; 13(11). <https://doi.org/10.1371/journal.pone.0207132> PMID: 30408106
52. Shlomain A, Leshno M, Goldstein DA. Cabozantinib for patients with advanced hepatocellular carcinoma: a cost-effectiveness analysis. *Therapeutic Advances in Gastroenterology*. 2019; 12:1756284819878304. <https://doi.org/10.1177/1756284819878304> PMID: 31579104
53. Sieg M, Hartmann M, Settmacher U, Arefian H. Comparative cost-effectiveness of cabozantinib as second-line therapy for patients with advanced hepatocellular carcinoma in Germany and the United States. *BMC Gastroenterology*. 2020; 20(1). <https://doi.org/10.1186/s12876-020-01241-y> PMID: 32316925
54. Soto-Perez-de-Celis E, Aguiar PN, Cordon ML, Chavarri-Guerra Y, Lopes GD. Cost-effectiveness of cabozantinib in the second-line treatment of advanced hepatocellular carcinoma. *Journal of the National Comprehensive Cancer Network: JNCCN*. 2019; 17(6):669–75.
55. Su D, Wu B, Shi LZ. Cost-effectiveness of atezolizumab plus bevacizumab vs sorafenib as first-line treatment of unresectable hepatocellular carcinoma. *JAMA Network Open*. 2021; 4(2):11. <https://doi.org/10.1001/jamanetworkopen.2021.0037> PMID: 33625508
56. Wen F, Zheng H, Zhang P, Liao W, Zhou K, Li Q. Atezolizumab and bevacizumab combination compared with sorafenib as the first-line systemic treatment for patients with unresectable hepatocellular carcinoma: a cost-effectiveness analysis in China and the United States. *Liver International*. 2021; 41(5):1097–104. <https://doi.org/10.1111/liv.14795> PMID: 33556230
57. Zhang P, Wen F, Li Q. FOLFOX4 or sorafenib as the first-line treatments for advanced hepatocellular carcinoma: a cost-effectiveness analysis. *Digestive and Liver Disease*. 2016; 48(12):1492–7. <https://doi.org/10.1016/j.dld.2016.07.007> PMID: 27486048
58. Zhang X, Wang J, Shi J, Jia X, Dang S, Wang W. Cost-effectiveness of atezolizumab plus bevacizumab vs sorafenib for patients with unresectable or metastatic hepatocellular carcinoma. *JAMA Network Open*. 2021; 4(4):e214846. <https://doi.org/10.1001/jamanetworkopen.2021.4846> PMID: 33825837
59. Zheng H, Qin Z, Qiu X, Zhan M, Wen F, Xu T. Cost-effectiveness analysis of ramucirumab treatment for patients with hepatocellular carcinoma who progressed on sorafenib with  $\alpha$ -fetoprotein concentrations of at least 400 ng/ml. *Journal of Medical Economics*. 2020; 23(4):347–52.
60. National Institute for Health and Care Excellence (NICE). NICE TA474. Sorafenib for treating advanced hepatocellular carcinoma. 2017.
61. National Institute for Health and Care Excellence (NICE). NICE TA551. Lenvatinib for untreated advanced hepatocellular carcinoma. 2018.
62. National Institute for Health and Care Excellence (NICE). NICE TA555. Regorafenib for previously treated advanced hepatocellular carcinoma. 2019.
63. National Institute for Health and Care Excellence (NICE). NICE TA666. Atezolizumab with bevacizumab for treating advanced or unresectable hepatocellular carcinoma. 2020.
64. National Institute for Health and Care Excellence (NICE). NICE TA849. Cabozantinib for previously treated advanced hepatocellular carcinoma. 2022.

65. pan-Canadian Oncology Drug Review (pCODR). pCODR 10119. Regorafenib for treatment of patients with unresectable hepatocellular carcinoma (HCC) who have been previously treated with sorafenib. 2018.
66. pan-Canadian Oncology Drug Review (pCODR). pCODR 10134. Nivolumab for the treatment of adult patients with advanced (not amenable to curative therapy or local therapeutic measures) or metastatic hepatocellular carcinoma who are intolerant to or have progressed on sorafenib therapy. 2018.
67. pan-Canadian Oncology Drug Review (pCODR). pCODR 10175. Lenvatinib for the first-line treatment of adult patients with unresectable hepatocellular carcinoma (HCC). 2019.
68. pan-Canadian Oncology Drug Review (pCODR). pCODR 10186. Cabozantinib for the treatment of hepatocellular carcinoma (HCC) in adults after prior therapy. 2020.
69. pan-Canadian Oncology Drug Review (pCODR). pCODR 10217. Atezolizumab in combination with bevacizumab for the first-line treatment of adult patients with unresectable or metastatic hepatocellular carcinoma (HCC) who require systemic therapy. 2020.
70. Zhou T, Ma A. The survival analysis applied in calculation of markov model transition probability in pharmaceutical evaluation. *Chinese Journal of Evidence-Based Medicine*. 2018; 18(10):1129–34.
71. National Institute for Health and Care Excellence (NICE). Guide to the methods of technology appraisal. 2013.
72. Liu G, Wu J, Xie F, Sun X, Li H, Guan H. China guidelines for pharmacoeconomic evaluations: a manual (2022). Beijing: China Market Press; 2022.
73. Guidelines for preparing submissions to the Pharmaceutical Benefits Advisory Committee (PBAC) Version 5.0. 2020.
74. Latimer NR. Survival analysis for economic evaluations alongside clinical trials—extrapolation with patient-level data: inconsistencies, limitations, and a practical guide. *Medical Decision Making*. 2013; 33(6):743–54. <https://doi.org/10.1177/0272989X12472398> PMID: 23341049
75. Srivastava T, Latimer NR, Tappenden P. Estimation of transition probabilities for state-transition models: a review of NICE appraisals. *Pharmacoeconomics*. 2021; 39(8):869–78. <https://doi.org/10.1007/s40273-021-01034-5> PMID: 34008137
76. Eddy DM, Hollingworth W, Caro JJ, Tsevat J, McDonald KM, Wong JB, et al. Model transparency and validation: a report of the ISPOR-SMDM Modeling Good Research Practices Task Force—7. *Value in Health*. 2012; 15(6):843–50. <https://doi.org/10.1016/j.jval.2012.04.012> PMID: 22999134
77. Vemer P, Corro Ramos I, van Voom GA, Al MJ, Feenstra TL. AdViSHE: A validation-assessment tool of health-economic models for decision makers and model users. *Pharmacoeconomics*. 2016; 34(4):349–61. <https://doi.org/10.1007/s40273-015-0327-2> PMID: 26660529
78. Sullivan TR, Latimer NR, Gray J, Sorich MJ, Salter AB, Karnon J. Adjusting for treatment switching in oncology trials: a systematic review and recommendations for reporting. *Value in Health*. 2020; 23(3):388–96. <https://doi.org/10.1016/j.jval.2019.10.015> PMID: 32197735
79. Latimer NR, Abrams KR. NICE DSU Technical Support Document 16: Adjusting survival time estimates in the presence of treatment switching. NICE Decision Support Unit Technical Support Documents. London 2014.
